# Supplementary material for: Mining of Cyanobacterial Genomes Indicates That Plasmids Are Involved in the Production of Natural Products
Source: Research Square preprint supplement (doi:10.21203/rs.3.rs-121751/v1), 2020-12-11
Supplement: Supplementary file 1 [file 0fac0fed9cc578dc45a0c014.xlsx]

## Sheet: NostocPCC7120
Nostoc sp. PCC 7120 pCC7120alpha- NC_003276.1
Acession number	Amino acids	Given name	Proposed function
WP_010999754.1	568	Alr7199	Relaxase
WP_010999755.1	539	ORF1	ATP-binding protein
WP_010999756.1	186	ORF2	Hypothetical protein
WP_044523624.1	180	ORF3	Restriction endonuclease
WP_010999758.1	319	ORF4	Integrase/recombinase
WP_010999759.1	201	Alr7204	Hypothetical protein
WP_011316312.1	99	Alr7205	Hypothetical protein
WP_010999761.1	939	Alr7206	Type IV secretion system DNA-binding domain-containing protein
WP_010999762.1	238	Alr7207	Hypothetical protein
WP_010999763.1	370	Alr7208	Hypothetical protein
WP_010999764.1	264	Alr7209	Hypothetical protein
WP_010999765.1	513	Alr7210	Type IV secretion system protein
WP_010999766.1	246	Alr7211	Hypothetical protein
WP_010999767.1	398	Alr7212	Hypothetical protein
WP_010999768.1	589	Alr7213	Type IV secretory system conjugative DNA transfer family protein

## Sheet: NostocATCC53789
Nostoc sp. PCC 7120 pCC7120alpha MOB+MPFc				Nostoc sp. ATCC 53789 pNsp_c- CP046706.1
Name	Function	Amino acids	Accession number	Acession number	Amino acids	Given name	Function	Cover (%)	Identity (%)
Alr7199	relaxase	568	WP_010999754.1	-	-	-	-	-	-
ORF1	ATP-binding protein	539	WP_010999755.1	-	-	-	-	-	-
ORF2	hypothetical protein	186	WP_010999756.1	-	-	-	-	-	-
ORF3	restriction endonuclease	180	WP_044523624.1	-	-	-	-	-	-
ORF4	integrase/recombinase	319	WP_010999758.1	-	-	-	-	-	-
Alr7204	hypothetical protein	201	WP_010999759.1	-	-	-	-	-	-
Alr7205	hypothetical protein	99	WP_011316312.1	-	-	-	-	-	-
Alr7206	type IV secretion system DNA-binding domain-containing protein	939	WP_010999761.1	-	-	-	-	-	-
Alr7207	hypothetical protein	238	WP_010999762.1	-	-	-	-	-	-
Alr7208	hypothetical protein	370	WP_010999763.1	-	-	-	-	-	-
Alr7209	hypothetical protein	264	WP_010999764.1	-	-	-	-	-	-
Alr7210	type IV secretion system protein	513	WP_010999765.1	-	-	-	-	-	-
Alr7211	hypothetical protein	246	WP_010999766.1	-	-	-	-	-	-
Alr7212	hypothetical protein	398	WP_010999767.1	-	-	-	-	-	-
Alr7213	type IV secretory system conjugative DNA transfer family protein	589	WP_010999768.1	-	-	-	-	-	-

## Sheet: FischerellaNIES-4106
Nostoc sp. PCC 7120 pCC7120alpha MOB+MPFc				Fischerella sp. NIES-4106 plasmid1- NZ_AP018299.1
Name	Function	Amino acids	Accession number	Acession number	Amino acids	Given name	Function	Cover (%)	Identity (%)
Alr7199	relaxase	568	WP_010999754.1	-	-	-	-	-	-
ORF1	ATP-binding protein	539	WP_010999755.1	-	-	-	-	-	-
ORF2	hypothetical protein	186	WP_010999756.1	-	-	-	-	-	-
ORF3	restriction endonuclease	180	WP_044523624.1	-	-	-	-	-	-
ORF4	integrase/recombinase	319	WP_010999758.1	-	-	-	-	-	-
Alr7204	hypothetical protein	201	WP_010999759.1	-	-	-	-	-	-
Alr7205	hypothetical protein	99	WP_011316312.1	-	-	-	-	-	-
Alr7206	type IV secretion system DNA-binding domain-containing protein	939	WP_010999761.1	-	-	-	-	-	-
Alr7207	hypothetical protein	238	WP_010999762.1	-	-	-	-	-	-
Alr7208	hypothetical protein	370	WP_010999763.1	-	-	-	-	-	-
Alr7209	hypothetical protein	264	WP_010999764.1	-	-	-	-	-	-
Alr7210	type IV secretion system protein	513	WP_010999765.1	-	-	-	-	-	-
Alr7211	hypothetical protein	246	WP_010999766.1	-	-	-	-	-	-
Alr7212	hypothetical protein	398	WP_010999767.1	-	-	-	-	-	-
Alr7213	type IV secretory system conjugative DNA transfer family protein	589	WP_010999768.1	-	-	-	-	-	-

## Sheet: GloeothecePCC7424
Nostoc sp. PCC 7120 pCC7120alpha MOB+MPFc				Gloeothece citriformis PCC 7424 pP742401- NC_011738.1
Name	Function	Amino acids	Accession number	Acession number	Amino acids	Given name	Function	Cover (%)	Identity (%)
Alr7199	relaxase	568	WP_010999754.1	-	-	-	-	-	-
ORF1	ATP-binding protein	539	WP_010999755.1	-	-	-	-	-	-
ORF2	hypothetical protein	186	WP_010999756.1	-	-	-	-	-	-
ORF3	restriction endonuclease	180	WP_044523624.1	-	-	-	-	-	-
ORF4	integrase/recombinase	319	WP_010999758.1	-	-	-	-	-	-
Alr7204	hypothetical protein	201	WP_010999759.1	-	-	-	-	-	-
Alr7205	hypothetical protein	99	WP_011316312.1	-	-	-	-	-	-
Alr7206	type IV secretion system DNA-binding domain-containing protein	939	WP_010999761.1	-	-	-	-	-	-
Alr7207	hypothetical protein	238	WP_010999762.1	-	-	-	-	-	-
Alr7208	hypothetical protein	370	WP_010999763.1	-	-	-	-	-	-
Alr7209	hypothetical protein	264	WP_010999764.1	-	-	-	-	-	-
Alr7210	type IV secretion system protein	513	WP_010999765.1	-	-	-	-	-	-
Alr7211	hypothetical protein	246	WP_010999766.1	-	-	-	-	-	-
Alr7212	hypothetical protein	398	WP_010999767.1	-	-	-	-	-	-
Alr7213	type IV secretory system conjugative DNA transfer family protein	589	WP_010999768.1	-	-	-	-	-	-

## Sheet: ScytonemaHK05
Nostoc sp. PCC 7120 pCC7120alpha MOB+MPFc				Scytonema sp. HK-05 plasmid1 - NC_011738.1
Name	Function	Amino acids	Accession number	Acession number	Amino acids	Given name	Function	Cover (%)	Identity (%)
Alr7199	relaxase	568	WP_010999754.1	-	-	-	-	-	-
ORF1	ATP-binding protein	539	WP_010999755.1	-	-	-	-	-	-
ORF2	hypothetical protein	186	WP_010999756.1	-	-	-	-	-	-
ORF3	restriction endonuclease	180	WP_044523624.1	-	-	-	-	-	-
ORF4	integrase/recombinase	319	WP_010999758.1	-	-	-	-	-	-
Alr7204	hypothetical protein	201	WP_010999759.1	-	-	-	-	-	-
Alr7205	hypothetical protein	99	WP_011316312.1	-	-	-	-	-	-
Alr7206	type IV secretion system DNA-binding domain-containing protein	939	WP_010999761.1	-	-	-	-	-	-
Alr7207	hypothetical protein	238	WP_010999762.1	-	-	-	-	-	-
Alr7208	hypothetical protein	370	WP_010999763.1	-	-	-	-	-	-
Alr7209	hypothetical protein	264	WP_010999764.1	-	-	-	-	-	-
Alr7210	type IV secretion system protein	513	WP_010999765.1	-	-	-	-	-	-
Alr7211	hypothetical protein	246	WP_010999766.1	-	-	-	-	-	-
Alr7212	hypothetical protein	398	WP_010999767.1	-	-	-	-	-	-
Alr7213	type IV secretory system conjugative DNA transfer family protein	589	WP_010999768.1	-	-	-	-	-	-

## Sheet: GloeothecePCC7822
Nostoc sp. PCC 7120 pCC7120alpha MOB+MPFc				Gloeothece verrucosa PCC 7822 Cy782201- NC_014533.1
Name	Function	Amino acids	Accession number	Acession number	Amino acids	Given name	Function	Cover (%)	Identity (%)
Alr7199	relaxase	568	WP_010999754.1	-	-	-	-	-	-
ORF1	ATP-binding protein	539	WP_010999755.1	-	-	-	-	-	-
ORF2	hypothetical protein	186	WP_010999756.1	-	-	-	-	-	-
ORF3	restriction endonuclease	180	WP_044523624.1	-	-	-	-	-	-
ORF4	integrase/recombinase	319	WP_010999758.1	-	-	-	-	-	-
Alr7204	hypothetical protein	201	WP_010999759.1	-	-	-	-	-	-
Alr7205	hypothetical protein	99	WP_011316312.1	-	-	-	-	-	-
Alr7206	type IV secretion system DNA-binding domain-containing protein	939	WP_010999761.1	-	-	-	-	-	-
Alr7207	hypothetical protein	238	WP_010999762.1	-	-	-	-	-	-
Alr7208	hypothetical protein	370	WP_010999763.1	-	-	-	-	-	-
Alr7209	hypothetical protein	264	WP_010999764.1	-	-	-	-	-	-
Alr7210	type IV secretion system protein	513	WP_010999765.1	-	-	-	-	-	-
Alr7211	hypothetical protein	246	WP_010999766.1	-	-	-	-	-	-
Alr7212	hypothetical protein	398	WP_010999767.1	-	-	-	-	-	-
Alr7213	type IV secretory system conjugative DNA transfer family protein	589	WP_010999768.1	-	-	-	-	-	-

## Sheet: CylindrospermumNIES4074
Similarity to Nostoc sp. PCC 7120 pCC7120alpha MOB+MPFc				Cylindrospermum sp. NIES-4074 plasmid1 - AP018270.1
Name	Function	Amino acids	Accession number	Acession number	Amino acids	Given name	Function	Cover (%)	Identity (%)
Alr7199	relaxase	568	WP_010999754.1	-	-	-	-	-	-
ORF1	ATP-binding protein	539	WP_010999755.1	-	-	-	-	-	-
ORF2	hypothetical protein	186	WP_010999756.1	-	-	-	-	-	-
ORF3	restriction endonuclease	180	WP_044523624.1	-	-	-	-	-	-
ORF4	integrase/recombinase	319	WP_010999758.1	-	-	-	-	-	-
Alr7204	hypothetical protein	201	WP_010999759.1	-	-	-	-	-	-
Alr7205	hypothetical protein	99	WP_011316312.1	-	-	-	-	-	-
Alr7206	type IV secretion system DNA-binding domain-containing protein	939	WP_010999761.1	-	-	-	-	-	-
Alr7207	hypothetical protein	238	WP_010999762.1	-	-	-	-	-	-
Alr7208	hypothetical protein	370	WP_010999763.1	-	-	-	-	-	-
Alr7209	hypothetical protein	264	WP_010999764.1	-	-	-	-	-	-
Alr7210	type IV secretion system protein	513	WP_010999765.1	-	-	-	-	-	-
Alr7211	hypothetical protein	246	WP_010999766.1	-	-	-	-	-	-
Alr7212	hypothetical protein	398	WP_010999767.1	-	-	-	-	-	-
Alr7213	type IV secretory system conjugative DNA transfer family protein	589	WP_010999768.1	-	-	-	-	-	-

## Sheet: NostocNIES25
Similarity to Nostoc sp. PCC 7120 pCC7120alpha MOB+MPFc				Nostoc linckia NIES-25 plasmid1- NZ_AP018223.1
Name	Function	Amino acids	Accession number	Acession number	Amino acids	Given name	Function	Cover (%)	Identity (%)
Alr7199	relaxase	568	WP_010999754.1	-	-	-	-	-	-
ORF1	ATP-binding protein	539	WP_010999755.1	-	-	-	-	-	-
ORF2	hypothetical protein	186	WP_010999756.1	-	-	-	-	-	-
ORF3	restriction endonuclease	180	WP_044523624.1	-	-	-	-	-	-
ORF4	integrase/recombinase	319	WP_010999758.1	-	-	-	-	-	-
Alr7204	hypothetical protein	201	WP_010999759.1	-	-	-	-	-	-
Alr7205	hypothetical protein	99	WP_011316312.1	-	-	-	-	-	-
Alr7206	type IV secretion system DNA-binding domain-containing protein	939	WP_010999761.1	-	-	-	-	-	-
Alr7207	hypothetical protein	238	WP_010999762.1	-	-	-	-	-	-
Alr7208	hypothetical protein	370	WP_010999763.1	-	-	-	-	-	-
Alr7209	hypothetical protein	264	WP_010999764.1	-	-	-	-	-	-
Alr7210	type IV secretion system protein	513	WP_010999765.1	-	-	-	-	-	-
Alr7211	hypothetical protein	246	WP_010999766.1	-	-	-	-	-	-
Alr7212	hypothetical protein	398	WP_010999767.1	-	-	-	-	-	-
Alr7213	type IV secretory system conjugative DNA transfer family protein	589	WP_010999768.1	-	-	-	-	-	-

## Sheet: NostocNIES2111
Similarity to Nostoc sp. PCC 7120 pCC7120alpha MOB+MPFc				Nostoc linckia NIES-2111 plasmid2- NZ_AP018186.1
Name	Function	Amino acids	Accession number	Acession number	Amino acids	Given name	Proposed function	Cover (%)	Identity (%)
Alr7199	relaxase	568	WP_010999754.1	WP_096683014.1	567	Alr7199	relaxase	100	86
ORF1	ATP-binding protein	539	WP_010999755.1	WP_096683015.1	539	ORF1	ATP-binding protein	100	91
ORF2	hypothetical protein	186	WP_010999756.1	WP_096683016.1	182	ORF2	hypothetical protein	98	78
ORF3	restriction endonuclease	180	WP_044523624.1	WP_096683018.1	186	ORF3	restriction endonuclease	97	81
ORF4	integrase/recombinase	319	WP_010999758.1	WP_096683019.1	320	ORF4	integrase/recombinase	100	79
Alr7204	hypothetical protein	201	WP_010999759.1	WP_096683020.1	197	Alr7204	hypothetical protein	94	88
Alr7205	hypothetical protein	99	WP_011316312.1	WP_096683021.1	101	Alr7205	hypothetical protein	98	86
Alr7206	type IV secretion system DNA-binding domain-containing protein	939	WP_010999761.1	WP_096683022.1	939	Alr7206	type IV secretion system DNA-binding domain-containing protein	100	90
Alr7207	hypothetical protein	238	WP_010999762.1	WP_096683023.1	238	Alr7207	hypothetical protein	99	86
Alr7208	hypothetical protein	370	WP_010999763.1	WP_096683024.1	365	Alr7208	hypothetical protein	99	77
Alr7209	hypothetical protein	264	WP_010999764.1	WP_096683025.1	264	Alr7209	hypothetical protein	100	78
Alr7210	type IV secretion system protein	513	WP_010999765.1	WP_096683026.1	517	Alr7210	type IV secretion system protein	100	80
Alr7211	hypothetical protein	246	WP_010999766.1	WP_096683027.1	248	Alr7211	hypothetical protein	100	84
Alr7212	hypothetical protein	398	WP_010999767.1	WP_096683028.1	409	Alr7212	hypothetical protein	100	84
Alr7213	type IV secretory system conjugative DNA transfer family protein	589	WP_010999768.1	WP_096683029.1	600	Alr7213	type IV secretory system conjugative DNA transfer family protein	98	82

## Sheet: AulosiraNIES50
Similarity to Nostoc sp. PCC 7120 pCC7120alpha MOB+MPFc				Aulosira laxa NIES-50- NZ_AP018308.1
Name	Function	Amino acids	Accession number	Acession number	Amino acids	Given name	Function	Cover (%)	Identity (%)
Alr7199	relaxase	568	WP_010999754.1	-	-	-	-	-	-
ORF1	ATP-binding protein	539	WP_010999755.1	-	-	-	-	-	-
ORF2	hypothetical protein	186	WP_010999756.1	-	-	-	-	-	-
ORF3	restriction endonuclease	180	WP_044523624.1	-	-	-	-	-	-
ORF4	integrase/recombinase	319	WP_010999758.1	-	-	-	-	-	-
Alr7204	hypothetical protein	201	WP_010999759.1	-	-	-	-	-	-
Alr7205	hypothetical protein	99	WP_011316312.1	-	-	-	-	-	-
Alr7206	type IV secretion system DNA-binding domain-containing protein	939	WP_010999761.1	-	-	-	-	-	-
Alr7207	hypothetical protein	238	WP_010999762.1	-	-	-	-	-	-
Alr7208	hypothetical protein	370	WP_010999763.1	-	-	-	-	-	-
Alr7209	hypothetical protein	264	WP_010999764.1	-	-	-	-	-	-
Alr7210	type IV secretion system protein	513	WP_010999765.1	-	-	-	-	-	-
Alr7211	hypothetical protein	246	WP_010999766.1	-	-	-	-	-	-
Alr7212	hypothetical protein	398	WP_010999767.1	-	-	-	-	-	-
Alr7213	type IV secretory system conjugative DNA transfer family protein	589	WP_010999768.1	-	-	-	-	-	-

[truncated: 1 more sheets: TolypothrixPCC7101]
