# Supplementary material for: Mining of Cyanobacterial Genomes Indicates That Plasmids Are Involved in the Production of Natural Products
Source: Research Square preprint supplement (doi:10.21203/rs.3.rs-121751/v1), 2020-12-11
Supplement: Supplementary file 2 [file 539789ea7380ef8d7f31f5c6.xlsx]

## Sheet: Genomes
Genome	Acession	Level	Size (Mbp)	GC%	CDS	Genes	tRNA	Chr	Chr Incision-element	Pld	Replicons	Release Date	BGCs-Chr	Known BGC-Chr	BGCs-Pld	Known BGC-Pld	Total BGCs
Acaryochloris marina MBIC11017	GCA_000018105.1	Complete	8.36	46.99	7046	7579	74	1	-	9	10	2007-10-16	10	-	2	-	12
Anabaena (Dolichospermum) sp. 90	GCA_000312705.1	Complete	5.31	38.09	4520	4918	44	2	-	3	5	2012-11-13	12	ANC, HAS, HG, MCY, MIC	-	-	12	Legend
Anabaena cylindrica PCC 7122	GCA_002367955.1	Chromosome	7.03	38.82	5778	6158	61	1	-	5	6	2017-06-24	12	HG	1	-	13	Chr	Chromossome
Anabaena cylindrica PCC 7122	GCA_000317695.1	Complete	7.06	38.8	5732	6230	67	1	-	6	7	2012-12-07	12	HG	1	-	13	BGC	Biosynthetica gene cluster
Anabaena sp. WA102	GCA_001277295.1	Complete	5.78	38.38	4927	5370	43	1	-	1	2	2015-09-01	15	HG	1	-	16	Pld	Plasmid
Anabaena sp. YBS01	GCA_009498015.1	Complete	7.01	41.4	5606	5890	46	1	-	-	1	2019-11-04	18	NPT	-	-	18
Anabaenopsis circularis NIES-21	GCA_002367975.1	Chromosome	7.07	40.52	5747	6068	97	1	-	3	4	2017-06-24	13	GEO	-	-	13
Arthrospira platensis C1	GCA_000307915.1	Chromosome	6.09	44.75	10953	11674	78	1	-	-	1	2012-09-24	2	-	-	-	2	AER	Aeruginosin
Arthrospira platensis NIES-39	GCA_000210375.1	Chromosome	6.79	44.3	5719	6431	40	1	-	-	1	2010-03-25	3	-	-	-	3	AGD	Aeruginoside
Arthrospira platensis YZ	GCA_001611905.1	Chromosome	6.52	44.2	5379	6248	39	1	-	-	1	2016-04-06	3	TEN	-	-	3	AMB	Ambiguine
Aulosira laxa NIES-50	GCA_002368055.1	Chromosome	9.35	40.7	7124	7463	74	1	-	6	7	2017-06-24	15	GEO	1	HAS*	16	ANC	Anacyclamide
Calothrix brevissima NIES-22	GCA_002367995.1	Chromosome	9.26	40.51	6977	7410	93	1	-	8	9	2017-06-24	17	-	2	-	19	APT	Anabaenopeptin
Calothrix parasitica NIES-267	GCA_002368095.1	Chromosome	9.49	36.84	7027	7420	69	1	-	5	6	2017-06-24	13	-	-	-	13	CRY	Cryptophycin
Calothrix sp. 336/3	GCA_000734895.2	Complete	6.42	41.06	5147	5386	64	1	-	3	4	2015-05-06	8	HG	-	-	8	CUR	Curacin
Calothrix sp. NIES-2098	GCA_002368175.1	Complete	8.88	41.18	7082	7386	75	1	-	1	2	2017-06-24	21	HG	-	-	21	CYL	Cylindrocyclophane
Calothrix sp. NIES-2100	GCA_002368195.1	Chromosome	9.96	41.5	7574	8011	73	1	-	1	2	2017-06-24	22	GEO, NPT	-	-	22	GEO	Geosmin
Calothrix sp. NIES-3974	GCA_002368395.1	Complete	5.99	41.5	4498	4730	42	1	-	-	1	2017-06-24	6	-	-	-	6	HAS	Hassalidin
Calothrix sp. NIES-4071	GCA_002368455.1	Complete	12.05	39.04	9858	10691	63	1	-	8	9	2017-06-24	21	HG, MER	1	-	22	HEC	Hectochlorin
Calothrix sp. NIES-4101	GCA_004296455.1	Complete	7.59	39.65	6434	6502	59	1	-	5	6	2017-06-24	9	-	1	-	10	HG	Heterocyst glycolipid
Calothrix sp. NIES-4105	GCA_002368415.1	Chromosome	12.04	39.05	9851	10671	63	1	-	7	8	2017-06-24	21	HG, MER	1	-	22	JAM	Jamaicamide
Calothrix sp. PCC 6303	GCA_000317435.1	Complete	6.96	39.8	5437	5723	43	1	-	3	4	2012-12-06	11	HG	1	-	12	MCC	Microcyclamide
Calothrix sp. PCC 7507	GCA_000316575.1	Complete	7.02	42.2	5778	6078	77	1	-	-	1	2012-12-04	11	GEO	-	-	11	MCY	Microcystin
Candidatus Atelocyanobacterium thalassa isolate ALOHA	GCA_000025125.1	Complete	1.44	31.1	1141	1214	37	1	-	-	1	2010-01-28	3	-	-	-	3	MER	Merocyclophane
Candidatus Melainabacteria bacterium MEL.A1	GCA_001765415.1	Complete	1.87	32.9	1772	1838	41	1	-	-	1	2016-10-13	1	-	-	-	1	MIC	Microviridin
Chamaesiphon minutus PCC 6605	GCA_000317145.1	Chromosome	6.76	45.65	6063	6384	56	1	-	2	3	2012-12-05	16	-	-	-	16	MPT	Micropeptin
Chondrocystis sp. NIES-4102	GCA_002368355.1	Complete	5	36.6	4198	4367	43	1	-	6	7	2017-06-24	10	-	-	-	10	NDA	Nodularin
Chroococcidiopsis thermalis PCC 7203	GCA_000317125.1	Complete	6.69	44.44	5716	5950	46	1	-	2	3	2012-12-05	12	-	-	-	12	NOS	Nosperin
Crinalium epipsammum PCC 9333	GCA_000317495.1	Complete	5.62	40.2	4760	5031	42	1	-	8	9	2012-12-06	9	-	1	-	10	NTC	Nostocyclopeptide
Crocosphaera subtropica ATCC 51142	GCA_000017845.1	Complete	5.46	37.97	4890	5042	43	2	-	4	6	2008-04-01	7	-	-	-	7	NTP	Nostopeptolide
Cyanobacterium aponinum PCC 10605	GCA_000317675.1	Complete	4.18	34.97	3402	3580	43	1	-	1	2	2012-12-07	8	-	-	-	8	PIR	Piricyclamide
cyanobacterium endosymbiont of Epithemia turgida isolate EtSB Lake Yunoko	GCA_000829235.1	Complete	2.79	33.4	1600	1819	39	1	-	-	1	2014-07-23	3	-	-	-	3	PLG	Prenylagaramide
cyanobacterium endosymbiont of Rhopalodia gibberula	GCA_003574135.1	Complete	3.02	33.9	1776	1956	39	1	-	-	1	2017-10-17	3	-	-	-	3	PRE	Prenylagaramide
Cyanobacterium sp. HL-69	GCA_002813895.1	Complete	3.3	37.66	2947	3099	43	1	-	2	3	2017-12-07	4	-	-	-	4	PSPU	Pseudospumigin
Cyanobacterium stanieri PCC 7202	GCA_000317655.1	Complete	3.16	38.7	2837	2941	43	1	-	-	1	2012-12-07	3	-	-	-	3	SHI	Shinorine
Cyanobium gracile PCC 6307	GCA_000316515.1	Complete	3.34	68.7	3255	3404	45	1	-	-	1	2012-12-04	7	-	-	-	7	SPU	Spumigin
Cyanobium sp. NIES-981	GCA_900088535.1	Complete	3.02	68.6	2873	3049	46	1	-	-	1	2016-06-02	8	-	-	-	8	TEN	Tenuecyclamide
Cyanothece sp. PCC 7425	GCA_000022045.1	Complete	5.79	50.66	5194	5402	48	1	-	3	4	2009-01-09	13	-	1	-	14	TRI	Trichamide
Cylindrospermum sp. NIES-4074	GCA_003994795.1	Chromosome	7.7	42	6534	6620	75	1	-	4	5	2017-06-24	19	HG, MER	4	AER*	23	VIR	Viridisamide
Cylindrospermum stagnale PCC 7417	GCA_000317535.1	Chromosome	7.61	42.2	6116	6528	74	1	-	3	4	2012-12-06	23	ANC, CYL, HG	1	-	24
Dactylococcopsis salina PCC 8305	GCA_000317615.1	Complete	3.78	42.4	3444	3701	42	1	-	-	1	2012-12-07	2	-	-	-	2
Dolichospermum compactum NIES-806	GCA_002368115.1	Chromosome	5.17	38.2	4310	4785	43	1	-	-	1	2017-06-24	8	APT	-	-	8	*	BGCs identified through manual curation (Table S2)
Dolichospermum sp. UHCC 0315A	GCA_008121535.1	Complete	5.64	38.19	4625	5278	44	1	-	3	4	2019-08-28	14	APT, HG, MCT	-	-	14
Euhalothece natronophila Z-M001	GCA_007904085.1	Complete	3.52	40.97	3257	3466	44	1	-	4	5	2019-08-08	2	-	-	-	2
Fischerella sp. NIES-3754	GCA_001548455.1	Complete	5.83	40.99	4584	4911	44	1	-	2	3	2015-12-05	13	HG	-	-	13
Fischerella sp. NIES-4106	GCA_002368315.1	Chromosome	7.25	40.04	5701	6183	50	1	-	8	9	2017-06-24	12	GEO, HG	5	AMB, MCY	17
Fremyella diplosiphon NIES-3275	GCA_002368275.1	Chromosome	10.13	40.75	7691	8157	88	1	-	14	15	2017-06-24	23	TEN	1	-	24
Geitlerinema sp. PCC 7407	GCA_000317045.1	Complete	4.68	58.5	3760	3893	48	1	-	-	1	2012-12-05	5	-	-		5
Geminocystis herdmanii PCC 6308	GCA_000332235.1	Chromosome	4.26	34.3	3925	4116	40	1	-	-	1	2013-01-17	5	-	-	-	5
Geminocystis sp. NIES-3708	GCA_001548095.1	Complete	4.04	32.3	3364	3578	44	1	-	5	6	2015-03-18	3	-	-	-	3
Geminocystis sp. NIES-3709	GCA_001548115.1	Complete	4.43	33.32	3540	3799	43	1	-	11	12	2015-03-18	5	-	-	-	5
Gloeobacter kilaueensis JS1	GCA_000484535.1	Complete	4.72	60.5	4337	4511	50	1	-	-	1	2013-10-28	6	-	-	-	6
Gloeobacter violaceus PCC 7421	GCA_000011385.1	Complete	4.66	62	4430	4482	45	1	-	-	1	2003-09-25	7	-	-	-	7
Gloeocapsa sp. PCC 7428	GCA_000317555.1	Complete	5.88	43.39	4987	5238	41	1	-	4	5	2012-12-06	8	-	3	-	11
Gloeomargarita lithophora Alchichica-D10	GCA_001870225.1	Chromosome	3.05	52.2	2945	3084	43	1	-	-	1	2016-11-07	4	-	-	-	4
Gloeothece citriformis PCC 7424	GCA_000021825.1	Complete	6.55	38.5	5537	5843	46	1	-	6	7	2008-12-17	9	-	2	APT*	11
Gloeothece verrucosa PCC 7822	GCA_000147335.1	Complete	7.84	39.87	6587	6968	50	1	-	6	7	2010-09-15	7	-	7	APT*	14
Halomicronema hongdechloris C2206	GCA_002075285.3	Complete	5.58	54.6	4661	5115	45	1	-	-	1	2017-06-22	9	-	-	-	9
Halothece sp. PCC 7418	GCA_000317635.1	Complete	4.18	42.9	3669	3884	46	1	-	-	1	2012-12-07	3	-	-	-	3
Leptolyngbya boryana dg5	GCA_002142495.1	Complete	6.8	47.01	6057	6327	67	1	-	3	4	2015-02-14	13	-	1	-	14
Leptolyngbya boryana IAM M-101	GCA_002142475.1	Complete	6.8	47.01	6058	6327	67	1	-	3	4	2015-02-14	13	-	1	-	14
Leptolyngbya boryana NIES-2135	GCA_002368255.1	Complete	7.23	47.01	6491	6757	67	1	-	3	4	2017-06-24	13	-	1	-	14
Leptolyngbya sp. NIES-3755	GCA_001548435.1	Complete	6.76	46.66	6350	6603	68	1	-	3	4	2015-12-09	9	-	2	-	11
Leptolyngbya sp. O-77	GCA_001548395.1	Complete	5.48	55.9	4369	4719	45	1	-	-	1	2016-01-29	9	-	-	-	9
Leptolyngbya sp. PCC 7376	GCA_000316605.1	Complete	5.13	43.9	4177	4608	47	1	-	-	1	2012-12-04	8	-	-	-	8
Limnospira indica PCC 8005	GCA_000973065.1	Chromosome	6.23	44.7	5125	5830	42	1	-	-	1	2014-02-14	3	-	-	-	3
Microcoleus sp. PCC 7113	GCA_000317515.1	Complete	7.97	46.2	6353	6701	71	1	-	8	9	2012-12-06	9	-	-	-	9
Microcystis aeruginosa NIES-2481	GCA_001704955.2	Complete	4.44	42.86	3966	4385	41	1	-	1	2	2016-08-15	9	AER, MIC, MPT			9
Microcystis aeruginosa NIES-2549	GCA_000981785.2	Complete	4.3	42.9	3818	4203	41	1	-	1	2	2015-04-29	9	AER, MIC, MPT	-	-	9
Microcystis aeruginosa NIES-843	GCA_000010625.1	Complete	5.84	42.3	4997	5949	42	1	-	-	1	2008-01-24	12	AER, MCY, MIC, MPT, PIR	-	-	12
Microcystis aeruginosa PCC 7806SL	GCA_002095975.1	Complete	5.14	42.1	4467	5125	42	1	-	-	1	2017-04-18	10	AER, MIC, MCC, MCY	-	-	10
Microcystis panniformis FACHB-1757	GCA_001264245.1	Complete	5.69	42.4	4590	5845	42	1	-	-	1	2015-08-11	12	AER, MCY, MIC, PIR	-	-	12
Microcystis sp. MC19	GCA_003019735.1	Complete	5.02	42.7	4475	5121	42	1	-	-	1	2018-03-27	9	MIC	-	-	9
Microcystis viridis NIES-102	GCA_003945305.1	Complete	5.87	42.4	4941	6073	42	1	-	-	1	2018-11-22	11	AER, MIC	-	-	11
Moorea producens JHB	GCA_001854205.1	Chromosome	9.38	43.7	6846	7770	52	1	-	2	3	2016-10-26	42	HEC, JAM	-	-	42
Moorea producens PAL-8-15-08-1	GCA_001767235.1	Complete	9.71	43.5	6904	7726	61	1	-	1	2	2016-10-18	42	HEC, CUR	-	-	42
Nodularia spumigena CCY9414	GCA_000340565.3	Chromosome	5.46	41.2	4517	4896	48	1	-	-	1	2014-02-14	10	AER*, APT*, HG, NOD, SPU	-	-	10
Nodularia spumigena UHCC 0039	GCA_003054475.1	Complete	5.39	41.26	4486	4836	44	1	-	1	2	2018-04-17	11	HG, NOD, SPU	-	-	11
Nostoc azollae 0708	GCA_000196515.1	Complete	5.49	38.33	3548	5354	42	1	-	2	3	2010-06-14	7	HG	-	-	7
Nostoc carneum NIES-2107	GCA_002368155.1	Chromosome	9.36	40.71	7158	7541	73	1	-	3	4	2017-06-24	17	-	3	-	20
Nostoc commune HK-02	GCA_003990685.1	Chromosome	8.23	41.41	7419	7489	61	1	-	8	9	2018-04-03	17	HG	2	-	19
Nostoc flagelliforme CCNUN1	GCA_002813575.1	Complete	10.23	41.84	8402	9746	76	1	-	8	9	2017-12-07	16	HG	4	-	20
Nostoc linckia NIES-25	GCA_002368035.1	Chromosome	8.59	41.26	6678	7042	72	1	-	4	5	2017-06-24	19	HG, NTP, SHI	3	GEO	22
Nostoc piscinale CENA21	GCA_001298445.1	Chromosome	7.09	40.5	5199	6159	76	1	-	-	1	2015-09-24	16	NTP	-	-	16
Nostoc punctiforme PCC 73102	GCA_000020025.1	Complete	9.06	41.34	6866	7564	84	1	-	5	6	2008-04-24	20	APT, GEO, HG, NPT,	3	-	23
Nostoc sp. ATCC 53789	GCA_009873495.1	Complete	8.65	41.38	6776	7263	93	1	-	12	13	2020-01-14	18	APT, GEO, HG, NTC	5	CRY	23
Nostoc sp. CENA543	GCA_002896875.1	Complete	7.21	40.8	5857	6112	73	1	-	5	6	2018-01-24	18	AER, HG, NOD, PSPU, SHI	-	-	18
Nostoc sp. HK-01	GCA_003990705.1	Complete	7.53	40.39	6424	6534	101	1	-	7	8	2018-04-03	14	GEO	-	-	14
Nostoc sp. 'Lobaria pulmonaria (5183) cyanobiont'	GCA_002949795.1	Complete	7.34	41.59	5889	6516	70	1	-	4	5	2018-02-26	13	HG	1	-	14
Nostoc sp. NIES-2111	GCA_002368215.1	Chromosome	7.88	40.55	6 36	6753	88	1	-	9	10	2017-06-24	14	HG, NPT, SHI	4	GEO	18
Nostoc sp. NIES-3756	GCA_001548375.1	Complete	6.99	40.55	5679	6004	64	1	-	2	3	2015-11-18	15	HG, NPT, SHI	3	-	18
Nostoc sp. NIES-4103	GCA_002368335.1	Chromosome	8.59	41.18	6607	6994	73	1	-	1	2	2017-06-24	33	HG	1	-	34
Nostoc sp. PCC 7107	GCA_000316625.1	Complete	6.33	40.4	5176	5449	79	1	-	-	1	2012-12-04	12	-	-	-	12
Nostoc sp. PCC 7120 = FACHB-418	GCA_000009705.1	Complete	7.21	41.22	5757	6129	70	1	-	6	7	2001-11-28	13	HG	1	-	14
Nostoc sp. PCC 7524	GCA_000316645.1	Complete	6.72	41.5	5352	5639	60	1	-	2	3	2012-12-04	15	HG, SHI	-	-	15
Nostoc sp. 'Peltigera membranacea cyanobiont' N6	GCA_002949735.1	Complete	8.9	41.35	6978	7658	114	1	-	10	11	2018-02-26	18	APT, GEO, HG, NOS, NPT	1	-	19
Nostoc sphaeroides Kutzing Em	GCA_003443655.1	Complete	6.68	41.58	5368	5916	66	1	-	4	5	2018-09-04	8	HG	1	-	9
Nostoc sphaeroides CCNUC1	GCA_009372195.1	Complete	9.52	41.3	7590	8625	73	2	-	7	9	2019-10-28	13	HG	3	-	16
Nostocales cyanobacterium HT-58-2	GCA_002163975.1	Complete	7.9	42.6	6195	6596	44	1	-	2	3	2017-06-02	18	HG	-	-	18
Oscillatoria acuminata PCC 6304	GCA_000317105.1	Complete	7.8	47.61	5783	6061	67	1	-	2	3	2012-12-05	9	-	1	-	10
Oscillatoria nigro-viridis PCC 7112	GCA_000317475.1	Complete	8.27	45.81	6200	6896	74	1	-	5	6	2012-12-06	7	VIR	-	-	7
Oscillatoriales cyanobacterium JSC-12	GCA_000309945.1	Chromosome	5.53	47.5	9525	10026	88	1	-	-	1	2012-11-05	5	-	-	-	5
Planktothrix agardhii NIES-204	GCA_003609755.1	Complete	5.08	39.64	4492	4547	43	1	-	4	5	2018-04-03	8	AER, APT, MIC, PRE	2	-	10
Planktothrix agardhii NIVA-CYA 126/8	GCA_000710505.1	Chromosome	5.05	39.55	4213	4528	40	1	-	5	6	2014-06-20	9	AGD, MCY, PRE	2	-	11
Pleurocapsa sp. PCC 7327	GCA_000317025.1	Complete	4.99	45.2	4226	4553	42	1	-	-	1	2012-12-05	11	-	-	-	11
Prochlorococcus marinus str. AS9601	GCA_000015645.1	Complete	1.67	31.3	1787	1844	38	1	-	-	1	2007-01-19	4	-	-	-	4
Prochlorococcus marinus str. MIT 9211	GCA_000018585.1	Chromosome	1.69	38	1747	1816	40	1	-	-	1	2007-11-13	5	-	-	-	5
Prochlorococcus marinus str. MIT 9215	GCA_000018065.1	Complete	1.74	31.1	1983	2055	36	1	-	-	1	2007-09-20	5	-	-	-	5
Prochlorococcus marinus str. MIT 9301	GCA_000015965.1	Complete	1.64	31.3	1785	1839	37	1	-	-	1	2007-03-05	4	-	-	-	4
Prochlorococcus marinus str. MIT 9303	GCA_000015705.1	Complete	2.68	50	2997	3136	43	1	-	-	1	2007-01-22	22	-	-	-	22
Prochlorococcus marinus str. MIT 9312	GCA_000012645.1	Complete	1.71	31.2	1817	1868	38	1	-	-	1	2005-11-02	4	-	-	-	4
Prochlorococcus marinus str. MIT 9313	GCA_000011485.1	Complete	2.41	50.7	2321	2430	44	1	-	-	1	2003-08-14	16	-	-	-	16
Prochlorococcus marinus str. MIT 9515	GCA_000015665.1	Complete	1.7	30.8	1792	1856	37	1	-	-	1	2007-01-19	5	-	-	-	5
Prochlorococcus marinus str. NATL1A	GCA_000015685.1	Complete	1.86	35	1999	2059	38	1	-	-	1	2007-01-22	5	-	-	-	5
Prochlorococcus marinus str. NATL2A	GCA_000012465.1	Complete	1.84	35.1	1953	2010	39	1	-	-	1	2005-08-09	5	-	-	-	5
Prochlorococcus marinus subsp. marinus str. CCMP1375	GCA_000007925.1	Complete	1.75	36.4	1882	1930	40	1	-	-	1	2003-07-25	4	-	-	-	4
Prochlorococcus marinus subsp. pastoris str. CCMP1986	GCA_000011465.1	Complete	1.66	30.8	1796	1849	37	1	-	-	1	2003-08-14	4	-	-	-	4
Prochlorococcus sp. MIT 0604	GCA_000757845.1	Complete	1.78	31.2	1921	1979	38	1	-	-	1	2014-09-25	4	-	-	-	4
Prochlorococcus sp. MIT 0801	GCA_000757865.1	Complete	1.93	34.9	2034	2111	39	1	-	-	1	2014-09-25	4	-	-	-	4
Prochlorococcus sp. RS01	GCA_001989435.1	Chromosome	1.66	31.4	1797	1844	38	1	-	-	1	2017-02-07	4	-	-	-	4
Prochlorococcus sp. RS04	GCA_001989455.1	Chromosome	1.66	31.4	1798	1844	38	1	-	-	1	2017-02-07	4	-	-	-	4
Prochlorococcus sp. RS50	GCA_001989415.1	Chromosome	1.66	31.4	1795	1842	38	1	-	-	1	2017-02-07	4	-	-	-	4
Pseudanabaena sp. ABRG5-3	GCA_003967015.1	Complete	5.66	42.19	4870	5068	52	1	-	7	8	2018-01-04	3	-	3	-	6
Pseudanabaena sp. PCC 7367	GCA_000317065.1	Complete	4.89	46.21	3823	3952	46	1	-	1	2	2012-12-05	2	-	-	-	2
Raphidiopsis curvata NIES-932	GCA_002368135.1	Chromosome	3.43	40.5	2900	3126	42	1	-	-	1	2017-06-24	7	HAS*	-	-	7
Rippkaea orientalis PCC 8801	GCA_000021805.1	Complete	4.79	39.8	4302	4518	45	1	-	3	4	2008-12-17	8	-	-	-	8
Rippkaea orientalis PCC 8802	GCA_000024045.1	Complete	4.8	39.8	4375	4561	44	1	-	4	5	2009-08-26	8	-	-	-	8
Rivularia sp. PCC 7116	GCA_000316665.1	Complete	8.73	37.5	6441	6724	55	1	-	2	3	2012-12-04	14	-		-	14
Scytonema sp. HK-05	GCA_002368235.1	Chromosome	9.76	43.74	7436	8122	43	1	-	7	8	2017-06-24	25	GEO, HG	3	APT	28
Scytonema sp. NIES-4073	GCA_002368435.1	Chromosome	9.85	43.43	7543	8229	46	1	-	4	5	2017-06-24	24	HG	1	-	25
Sphaerospermopsis kisseleviana NIES-73	GCA_002368075.1	Chromosome	5.61	37.76	4744	5146	44	1	-	1	2	2017-06-24	7	APT, HG	-	-	7
Stanieria cyanosphaera PCC 7437	GCA_000317575.1	Complete	5.54	36.27	4732	4969	45	1	-	5	6	2012-12-06	12	-	1	-	13
Stanieria sp. NIES-3757	GCA_002355455.1	Complete	5.46	36.55	4668	4926	44	1	-	1	2	2016-03-05	9	-	1	-	10
Synechococcus elongatus PCC 11801	GCA_003846445.1	Chromosome	2.69	54.9	2459	2678	39	1	-	-	1	2018-11-28	3	-	-	-	3
Synechococcus elongatus PCC 11802	GCA_009498715.1	Chromosome	2.76	54.8	2446	2752	39	1	-	-	1	2019-11-04	3	-	-	-	3
Synechococcus elongatus PCC 6301	GCA_000010065.1	Complete	2.7	55.5	2615	2715	45	1	-	-	1	2004-12-14	3	-	-	-	3
Synechococcus elongatus PCC 7942 = FACHB-805	GCA_000012525.1	Complete	2.74	55.46	2685	2756	45	1	-	1	2	2005-11-08	3	-		-	3
Synechococcus elongatus UTEX 3055	GCA_003957805.1	Complete	2.88	55.13	2815	2899	46	1	-	2	3	2018-12-21	3	-	-	-	3
Synechococcus lividus PCC 6715	GCA_002754935.1	Complete	2.66	53.5	2246	2592	41	1	-	-	1	2017-11-06	3	-	-	-	3
Synechococcus sp. CB0101	GCA_000179235.2	Complete	2.79	64.1	2 88	3027	46	1	-	-	1	2019-04-05	14	-	-	-	14
Synechococcus sp. CC9311	GCA_000014585.1	Complete	2.61	52.4	2627	2717	44	1	-	-	1	2006-09-01	11	-	-	-	11
Synechococcus sp. CC9605	GCA_000012625.1	Complete	2.51	59.2	2641	2756	46	1	-	-	1	2005-10-27	7	-	-	-	7
Synechococcus sp. CC9902	GCA_000012505.1	Complete	2.23	54.2	2338	2405	44	1	-	-	1	2005-10-26	11	-	-	-	11
Synechococcus sp. JA-2-3B'a(2-13)	GCA_000013225.1	Complete	3.05	58.5	2628	2830	44	1	-	-	1	2006-02-06	1	-	-	-	1
Synechococcus sp. JA-3-3Ab	GCA_000013205.1	Complete	2.93	60.2	2569	2806	47	1	-	-	1	2006-02-06	1	-	-	-	1
Synechococcus sp. KORDI-100	GCA_000737535.1	Complete	2.79	57.5	2846	2935	42	1	-	-	1	2014-08-04	12	-	-	-	12
Synechococcus sp. KORDI-49	GCA_000737575.1	Complete	2.59	61.4	2555	2628	44	1	-	-	1	2014-08-04	5	-	-	-	5
Synechococcus sp. KORDI-52	GCA_000737595.1	Complete	2.57	59.1	2602	2701	46	1	-	-	1	2014-08-04	7	-	-	-	7
Synechococcus sp. NIES-970	GCA_002356215.1	Complete	3.12	49.43	2864	2958	44	1	-	4	5	2017-02-08	3	-	1	-	4
Synechococcus sp. PCC 11901	GCA_005577135.1	Chromosome	3.47	49.15	3169	3315	42	1	-	5	6	2019-05-22	3	-	1	-	4
Synechococcus sp. PCC 6312	GCA_000316685.1	Complete	3.72	48.49	3520	3672	41	1	-	1	2	2012-12-04	3	-	-	-	3
Synechococcus sp. PCC 7002	GCA_000019485.1	Complete	3.41	49.16	3145	3240	45	1	-	6	7	2008-03-14	3	-	1	-	4
Synechococcus sp. PCC 7003	GCA_001693255.1	Complete	3.35	49.3	3069	3182	43	1	-	2	3	2016-07-25	3	-	-	-	3
Synechococcus sp. PCC 7117	GCA_001693275.1	Complete	3.43	49.12	3157	3274	45	1	-	5	6	2016-07-25	3	-	1	-	4
Synechococcus sp. PCC 73109	GCA_001521855.1	Complete	3.3	49.34	3029	3128	45	1	-	5	6	2016-01-21	3	-	-	-	3
Synechococcus sp. PCC 7336	GCA_000332275.1	Chromosome	5.07	53.7	4369	4596	43	1	-	-	1	2013-01-18	8	-	-	-	8
Synechococcus sp. PCC 7502	GCA_000317085.1	Complete	3.58	40.6	3386	3660	42	1	-	2	3	2012-12-05	6	-	-	-	6
Synechococcus sp. PCC 8807	GCA_001693295.1	Complete	3.3	49.37	3084	3183	45	1	-	6	7	2016-07-25	3	-	-	-	3
Synechococcus sp. RCC307	GCA_000063525.1	Complete	2.22	60.8	2388	2457	41	1	-	-	1	2007-05-19	5	-	-	-	5
Synechococcus sp. RSCCF101	GCA_008807075.1	Complete	2.98	68	2696	2886	45	1	-	-	1	2019-10-03	6	-	-	-	6
Synechococcus sp. SynAce01	GCA_001885215.1	Complete	2.75	63.9	2701	2857	44	1	-	-	1	2016-11-22	7	-	-	-	7
Synechococcus sp. UTEX 2973	GCA_000817325.1	Complete	2.74	55.47	2684	2755	44	1	-	2	3	2015-01-09	3	-	-	-	3
Synechococcus sp. WH 7803	GCA_000063505.1	Complete	2.37	60.2	2456	2528	43	1	-	-	1	2007-05-19	11	-	-	-	11
Synechococcus sp. WH 8020	GCA_001040845.1	Chromosome	2.66	53.1	2679	2762	43	1	-	-	1	2015-06-26	9	-	-	-	9
Synechococcus sp. WH 8101	GCA_004209775.1	Complete	2.63	63.3	2693	2787	43	1	-	-	1	2019-02-19	12	-	-	-	12
Synechococcus sp. WH 8102	GCA_000195975.1	Complete	2.43	59.4	2537	2642	44	1	-	-	1	2003-08-14	8	-	-	-	8
Synechococcus sp. WH 8103	GCA_001182765.1	Complete	2.43	59.5	2501	2602	44	1	-	-	1	2015-07-09	8	-	-	-	8
Synechococcus sp. WH 8109	GCA_000161795.2	Complete	2.11	60.1	2212	2327	44	1	-	-	1	2014-01-09	6	-	-	-	6
Synechocystis sp. IPPAS B-1465	GCA_003015225.1	Complete	3.95	47.35	3578	3733	41	1	-	6	7	2018-03-26	3	-	-	-	3
Synechocystis sp. PCC 6714	GCA_000478825.2	Complete	3.74	47.54	3282	3495	42	1	-	3	4	2014-07-09	3	-	-	-	3
Synechocystis sp. PCC 6803	GCA_001318385.1	Complete	3.57	47.7	3171	3305	41	1	-	-	1	2015-10-16	3	-	-	-	3
Synechocystis sp. PCC 6803	GCA_000009725.1	Complete	3.95	47.35	3556	3710	41	1	-	4	5	2001-07-27	3	-	-	-	3
Synechocystis sp. PCC 6803	GCA_000340785.1	Complete	3.95	47.35	3559	3711	41	1	-	7	8	2013-02-19	3	-	-	-	3
Synechocystis sp. PCC 6803 (GT-S)	GCA_000270265.1	Complete	3.57	47.7	3181	3306	41	1	-	-	1	2011-07-01	3	-	-	-	3
Synechocystis sp. PCC 6803 substr. GT-I	GCA_000284135.1	Complete	3.57	47.7	3182	3308	41	1	-	-	1	2011-12-01	3	-	-	-	3
Synechocystis sp. PCC 6803 substr. PCC-N	GCA_000284215.1	Complete	3.57	47.7	3181	3308	41	1	-	-	1	2011-12-01	3	-	-	-	3
Synechocystis sp. PCC 6803 substr. PCC-P	GCA_000284455.1	Complete	3.57	47.7	3180	3306	41	1	-	-	1	2011-12-01	3	-	-	-	3
Thermosynechococcus elongatus BP-1	GCA_000011345.1	Complete	2.59	53.9	2476	2525	42	1	-	-	1	2002-08-17	3	-	-	-	3
Thermosynechococcus elongatus PKUAC-SCTE542	GCA_003555505.1	Complete	2.65	53.3	1625	2617	41	1	-	-	1	2018-09-13	3	-	-	-	3
Thermosynechococcus sp. CL-1	GCA_008386235.1	Complete	2.65	53.5	2466	2597	41	1	-	-	1	2019-09-16	3	-	-	-	3
Thermosynechococcus sp. NK55a	GCA_000505665.1	Chromosome	2.52	53.8	2292	2448	41	1	-	-	1	2013-12-11	3	-	-	-	3
Thermosynechococcus vulcanus NIES-2134	GCA_003990665.2	Complete	2.57	53.9	2413	2530	40	1	-	-	1	2017-06-24	3	-	-	-	3
Tolypothrix tenuis PCC 7101	GCA_002368295.1	Chromosome	9.35	40.69	7118	7460	72	1	-	5	6	2017-06-24	15	GEO	1	HAS*	16
Trichodesmium erythraeum IMS101	GCA_000014265.1	Complete	7.75	34.1	4622	5217	38	1	-	-	1	2006-07-06	7	TRI	-	-	7
Trichormus variabilis ATCC 29413	GCA_000204075.1	Complete	7.11	41.39	5676	5941	47	1	1	3	5	2005-09-15	14	HG, NTP, SHI	2	-	16
Trichormus variabilis NIES-23	GCA_002368015.1	Chromosome	7.47	41.36	6004	6353	68	1	-	5	6	2017-06-24	13	HG	1	-	14
										424			1719		99		1818

## Sheet: Chromosomes
Genome	Name	Accession number	Acyl_amino_acids	Amglyccycl	Arypolyene	Arypolyene, NRPS	Bacteriocin	Bacteriocin, cyanobactin	Bacteriocin, cyanobactin, LAP	Bacteriocin, cyanobactin, LAP, thiopeptide	Bacteriocin, lanthipeptide	Bacteriocin, lanthipeptide, NRPS	Bacteriocin, LAP	Bacteriocin, LAP, NRPS, PKS-like, transAT-PKS, T1PKS, T3PKS	Bacteriocin, LAP, NRPS, T1PKS	Bacteriocin, lassopeptide	Bacteriocin, microviridin	Bacteriocin, NRPS	Bacteriocin, NRPS, T1PKS	Bacteriosin, Proteosin	Bacteriocin, terpene	Bacteriocin, TfuA-related	Bacteriocin, T3PKS	Betalactone	Betalactone, hglE-KS, microviridin, NRPS, T1PKS	Betalactone, microviridin, NRPS	Betalactone, NRPS	Betalactone, NRPS, T1PKS	Butyrolactone	Butyrolactone, hglE-KS, T1PKS	CDPS	CDPS, NRPS, T1PKS	Cyanobactin	Cyanobactin, LAP	Cyanobactin, lassopeptide	Ectoine	hglE-KS	hglE-KS, NRPS, resorcinol	hglE-KS, resorcinol	hglE-KS, NRPS, T1PKS	hglE-KS, NRPS, T1PKS, T3PKS	hglE-KS,T1PKS	hglE-KS, transAT-PKS, T1PKS	Hserlactoine	Indole	Indole, NRPS	Indole, NRPS, T1PKS	Ladderane	Ladderane, lassopeptide
Acaryochloris marina MBIC11017	Chromosome	NC_009925.1	-	-	-	-	3	-	-	-	-	-	-	-	-	-	-	-	-	-	-	-	-	-	-	-	-	-	-	-	-	-	-	-	-	-	-	-	-	-	-	-	-	-	-	-	-	1	-
Anabaena cylindrica PCC 7122	Chromosome	NC_019771.1	-	-	-	-	2	-	-	-	-	-	-	-	-	-	-	-	-	-	-	-	-	-	-	-	-	-	-	-	-	-	-	-	-	-	-	1	-	-	-	1	-	-	-	-	-	-	-
Anabaena cylindrica PCC 7122	Chromosome	NZ_AP018166.1	-	-	-	-	2	-	-	-	-	-	-	-	-	-	-	-	-	-	-	-	-	-	-	-	-	-	-	-	-	-	-	-	-	-	-	1	-	-	-	1	-	-	-	-	-	-	-
Anabaena (Dolichospermum) sp. 90	chANA02	NC_019439.1	-	-	-	-	-	-	-	-	-	-	-	-	-	-	-	-	-	-	-	-	-	-	-	-	-	-	-	-	-	-	-	-	-	-	-	-	-	-	-	-	-	-	-	-	-	-	-
Anabaena (Dolichospermum) sp. 90	chANA01	NC_019427.1	-	-	-	-	1	-	-	-	-	-	-	-	-	-	-	-	-	-	-	-	-	-	-	-	-	1	-	-	-	-	1	-	-	-	1	-	-	-	-	1	-	-	-	-	-	-	-
Anabaena sp. WA102	Chromosome	NZ_CP011456.1	-	-	-	-	1	-	-	-	-	-	-	-	-	-	-	-	-	-	-	-	-	-	-	-	-	-	-	-	-	-	1	-	-	-	1	-	-	-	-	1	-	-	-	-	-	-	-
Anabaena sp. YBS01	Chromosome	NZ_CP034058.1	-	-	-	-	1	-	-	-	-	-	-	-	-	-	-	-	-	1	-	-	-	-	-	-	-	-	-	-	-	-	-	-	-	-	-	-	-	1	-	1	-	-	-	-	-	1	-
Anabaenopsis circularis NIES-21	Chromosome	NZ_AP018174.1	-	-	-	-	3	-	-	-	-	-	-	-	-	-	-	-	-	-	-	-	-	-	-	-	-	-	-	-	-	-	-	-	-	-	-	-	-	-	-	1	-	-	-	-	-	-	-
Arthrospira platensis C1	Chromosome	NZ_CM001632.1	-	-	-	-	-	-	1	-	-	-	-	-	-	-	-	-	-	-	1	-	-	-	-	-	-	-	-	-	-	-	-	-	-	-	-	-	-	-	-	-	-	-	-	-	-	-	-
Arthrospira platensis NIES-39	Chromosome	NC_016640.1	-	-	-	-	1	-	1	-	-	-	-	-	-	-	-	-	-	-	-	-	-	-	-	-	-	-	-	-	-	-	-	-	-	-	-	-	-	-	-	-	-	-	-	-	-	-	-
Arthrospira platensis YZ	Chromosome	NZ_CP013008.1	-	-	-	-	1	-	1	-	-	-	-	-	-	-	-	-	-	-	-	-	-	-	-	-	-	-	-	-	-	-	-	-	-	-	-	-	-	-	-	-	-	-	-	-	-	-	-
Aulosira laxa NIES-50	Chromosome	NZ_AP018307.1	-	-	-	-	2	-	-	-	-	-	-	-	-	-	-	-	-	-	-	-	-	-	-	-	-	-	-	-	-	-	1	-	-	-	-	-	-	-	-	1	-	-	-	-	-	-	-
Calothrix brevissima NIES-22	Chromosome	NZ_AP018207.1	-	-	-	-	1	-	-	1	-	-	-	-	-	-	-	1	-	-	-	-	-	-	-	-	-	-	-	-	-	-	-	-	-	-	-	-	-	-	-	1	-	-	-	-	-	-	-
Calothrix parasitica NIES-267	Chromosome	NZ_AP018227.1	-	-	-	-	2	-	-	-	-	-	-	-	-	-	-	-	-	-	-	-	-	-	-	-	-	-	-	-	-	-	-	-	-	-	-	-	-	-	-	1	-	-	3	-	-	-	-
Calothrix sp. 336/3	Chromosome	NZ_CP011382.1	-	-	-	-	2	-	-	-	-	-	-	-	-	-	-	-	-	-	-	-	-	-	-	-	-	-	-	-	-	-	-	-	-	-	-	-	-	-	-	1	-	-	-	-	-	-	-
Calothrix sp. NIES-2098	Chromosome	NZ_AP018172.1	-	-	-	-	4	-	-	-	1	-	-	-	-	-	-	-	-	-	-	-	-	-	-	-	-	-	-	-	-	-	-	-	-	-	1	-	-	-	-	-	-	-	-	-	-	-	-
Calothrix sp. NIES-2100	Chromosome	NZ_AP018178.1	-	-	-	-	4	-	-	-	-	-	-	-	-	-	-	-	-	-	-	-	-	-	-	-	-	-	-	-	-	-	1	-	-	-	-	-	-	-	-	1	-	-	-	-	-	1	-
Calothrix sp. NIES-3974	Chromosome	NZ_AP018254.1	-	-	-	-	1	-	-	-	1	-	-	-	-	-	1	-	-	-	-	-	-	-	-	-	-	-	-	-	-	-	-	-	-	-	1	-	-	-	-	-	-	-	-	-	-	-	-
Calothrix sp. NIES-4071	Chromosome	NZ_AP018255.1	-	-	-	-	2	-	-	-	-	-	-	-	-	-	-	1	-	-	-	-	-	-	-	-	-	-	-	-	-	-	-	-	-	-	-	-	-	-	-	1	-	-	1	-	-	-	-
Calothrix sp. NIES-4101	Chromosome	AP018280.1	-	-	-	-	2	-	-	-	-	-	-	-	-	-	-	-	-	-	-	-	-	-	-	-	-	-	-	-	-	-	-	-	-	-	-	-	-	-	-	1	-	-	1	-	-	-	-
Calothrix sp. NIES-4105	Chromosome	NZ_AP018290.1	-	-	-	-	2	-	-	-	-	-	-	-	-	-	-	1	-	-	-	-	-	-	-	-	-	-	-	-	-	-	-	-	-	-	-	-	-	-	-	1	-	-	1	-	-	-	-
Calothrix sp. PCC 6303	Chromosome	NC_019751.1	-	-	-	-	1	-	-	-	-	-	-	-	-	-	-	-	-	-	-	-	-	-	-	-	-	-	-	-	-	-	1	-	-	-	1	-	-	-	-	-	-	-	-	-	-	1	-
Calothrix sp. PCC 7507	Chromosome	NC_019682.1	-	-	-	-	1	-	-	-	-	-	-	-	-	-	-	-	-	-	-	-	-	-	-	-	-	-	-	-	-	-	-	-	-	-	-	-	-	-	-	1	-	-	-	-	-	-	-
Candidatus Atelocyanobacterium thalassa isolate ALOHA	Chromosome	NC_013771.1	-	-	-	-	-	-	-	-	-	-	-	-	-	-	-	-	-	-	-	-	-	-	-	-	-	-	-	-	-	-	-	-	-	-	-	-	-	-	-	-	-	-	-	-	-	-	-
Candidatus Melainabacteria bacterium MEL.A1	Chromosome	CP017245.1	-	-	1	-	-	-	-	-	-	-	-	-	-	-	-	-	-	-	-	-	-	-	-	-	-	-	-	-	-	-	-	-	-	-	-	-	-	-	-	-	-	-	-	-	-	-	-
Chamaesiphon minutus PCC 6605	Chromosome	NC_019697.1	-	-	-	-	6	-	-	-	1	-	-	-	-	-	-	-	-	-	-	-	-	-	-	-	-	-	-	-	-	-	-	-	-	-	-	-	-	-	-	-	-	-	1	1	-	-	-
Chondrocystis sp. NIES-4102	Chromosome	NZ_AP018281.1	-	-	-	-	1	-	-	-	-	-	-	-	-	-	-	-	-	-	-	-	-	-	-	-	-	-	-	-	-	-	-	-	-	-	-	-	-	-	-	-	-	-	-	-	1	-	-
Chroococcidiopsis thermalis PCC 7203	Chromosome	NC_019695.1	-	-	-	-	4	-	-	-	-	-	-	-	-	-	-	-	-	-	-	-	-	-	-	-	-	-	-	-	-	-	-	-	-	-	-	-	-	-	-	-	-	-	-	-	-	-	-
Crinalium epipsammum PCC 9333	Chromosome	NC_019753.1	-	-	-	-	4	-	-	-	-	-	-	-	-	-	-	-	-	-	-	-	-	-	-	-	-	-	-	-	-	-	-	-	-	-	-	-	-	-	-	-	-	-	-	-	-	-	-
Crocosphaera subtropica ATCC 51142	Circular	NC_010546.1	-	-	-	-	1	-	-	-	-	-	-	-	-	-	-	-	-	-	-	-	-	-	-	-	-	-	-	-	-	-	-	-	-	-	-	-	-	-	-	-	-	-	-	-	-	-	-
Cyanobacterium aponinum PCC 10605	Chromosome	NC_019776.1	-	-	1	-	2	-	-	-	1	-	-	-	-	-	-	-	-	-	-	-	-	-	-	-	-	-	-	-	-	-	-	-	-	-	-	-	-	-	-	-	-	-	-	-	-	-	-
cyanobacterium endosymbiont of Epithemia turgida isolate EtSB Lake Yunoko	Chromosome	NZ_AP012549.1	-	-	-	-	-	-	-	-	-	-	-	-	-	-	-	-	-	-	-	-	-	-	-	-	-	-	-	-	-	-	-	-	-	-	-	-	-	-	-	-	-	-	-	-	-	-	-
cyanobacterium endosymbiont of Rhopalodia gibberula	Chromosome	NZ_AP018341.1	-	-	-	-	-	-	-	-	-	-	-	-	-	-	-	-	-	-	1	-	-	-	-	-	-	-	-	-	-	-	-	-	-	-	-	-	-	-	-	-	-	-	-	-	-	-	-
Cyanobacterium sp. HL-69	Chromosome	CP024912.1	-	-	-	-	-	-	-	-	-	-	-	-	-	-	-	-	-	-	-	-	-	-	-	-	-	-	-	-	-	-	-	-	-	-	-	-	-	-	-	-	-	1	-	-	-	-	-
Cyanobacterium stanieri PCC 7202	Chromosome	NC_019778.1	-	-	-	-	-	-	-	-	-	-	-	-	-	-	-	-	-	-	-	-	-	-	-	-	-	-	-	-	-	-	-	-	-	-	-	-	-	-	-	-	-	-	-	-	-	-	-
Cyanobium gracile PCC 6307	Chromosome	NC_019675.1	-	-	-	-	4	-	-	-	-	-	-	-	-	-	-	-	-	-	-	-	-	-	-	-	-	-	-	-	-	-	-	-	-	-	-	-	-	-	-	-	-	-	-	-	-	-	-
Cyanobium sp. NIES-981	Chromosome	NZ_LT578417.1	-	-	-	-	5	-	-	-	-	-	-	-	-	-	-	-	-	-	-	-	-	-	-	-	-	-	-	-	-	-	-	-	-	-	-	-	-	-	-	-	-	-	-	-	-	-	-
Cyanothece sp. PCC 7425	Chromosome	NC_011884.1	-	-	-	-	3	-	1	-	2	-	-	-	-	-	-	-	-	-	-	-	-	-	-	-	-	-	-	-	-	-	-	-	-	-	-	-	-	-	-	-	-	-	-	-	-	-	-
Cylindrospermum sp. NIES-4074	Chromosome	AP018269.1	-	-	-	-	1	-	-	-	1	-	-	-	-	-	-	-	-	-	-	-	-	-	-	-	-	-	-	-	-	-	-	1	-	-	-	-	-	-	-	2	-	-	1	-	-	1	-
Cylindrospermum stagnale PCC 7417	Chromosome	NC_019757.1	-	-	-	-	-	-	-	-	-	-	-	-	-	-	-	-	-	-	-	-	-	-	-	-	1	-	-	-	-	-	1	-	-	-	-	-	-	-	-	2	-	-	-	-	-	-	1
Dactylococcopsis salina PCC 8305	Chromosome	NC_019780.1	-	-	-	-	-	-	-	-	-	-	-	-	-	-	-	-	-	-	-	-	-	-	-	-	-	-	-	-	-	-	-	-	-	-	-	-	-	-	-	-	-	-	-	-	-	-	-
Dolichospermum compactum NIES-806	Chromosome	NZ_AP018316.1	-	-	-	-	-	-	-	-	-	-	-	-	-	-	-	-	-	-	-	-	-	-	1	-	-	-	-	-	-	-	1	-	-	-	1	-	-	-	-	-	-	-	-	-	-	-	-
Dolichospermum sp. UHCC 0315A	Chromosome	NZ_CP043056.1	-	-	-	-	1	-	-	-	-	-	-	-	-	-	-	-	-	-	-	-	-	-	-	-	1	-	-	-	-	-	1	-	-	-	1	-	-	-	-	1	-	-	-	-	-	-	-
Euhalothece natronophila Z-M001	Chromosome	NZ_CP042326.1	-	-	-	-	-	-	-	-	-	-	-	-	-	-	-	-	-	-	-	-	-	1	-	-	-	-	-	-	-	-	-	-	-	-	-	-	-	-	-	-	-	-	-	-	-	-	-
Fischerella sp. NIES-3754	Chromosome	NZ_AP017305.1	-	-	-	-	3	-	-	-	-	-	-	-	-	-	-	-	-	-	-	-	-	-	-	-	-	-	-	-	-	-	-	-	-	-	1	-	1	-	-	1	-	-	-	-	-	-	-
Fischerella sp. NIES-4106	Chromosome	NZ_AP018298.1	-	-	-	-	2	-	-	-	-	-	-	-	-	-	-	-	-	-	-	-	-	-	-	-	-	-	-	-	-	-	-	-	-	-	1	-	1	-	-	1	-	-	-	-	-	-	-
Fremyella diplosiphon NIES-3275	Chromosome	NZ_AP018233.1	-	-	-	-	4	1	1	-	-	-	-	-	-	-	-	-	-	-	-	-	-	-	-	-	-	-	-	-	-	-	-	-	-	-	-	-	-	-	-	1	-	-	-	-	-	-	-
Geitlerinema sp. PCC 7407	Chromosome	NC_019703.1	-	-	1	-	1	-	-	-	-	-	-	-	-	-	-	-	-	-	-	-	-	-	-	-	-	-	-	-	-	-	-	-	-	-	-	-	-	-	-	-	-	-	-	-	-	-	-
Geminocystis herdmanii PCC 6308	Chromosome	NZ_CM001775.1	-	-	-	1	-	-	-	-	-	-	-	-	-	-	-	-	-	-	-	-	-	-	-	-	-	-	-	-	-	-	-	-	-	-	-	-	-	-	-	-	-	-	-	-	-	-	-
Geminocystis sp. NIES-3708	Chromosome	NZ_AP014815.1	-	-	-	-	-	-	-	-	-	-	-	-	-	-	-	-	-	-	-	-	-	-	-	-	-	-	-	-	-	-	-	-	-	-	-	-	-	-	-	-	-	-	-	-	-	-	-
Geminocystis sp. NIES-3709	Chromosome	NZ_AP014821.1	-	-	-	-	-	-	-	-	-	-	-	-	-	-	-	-	-	-	-	-	-	-	-	-	-	-	-	-	-	-	-	-	-	-	-	-	-	-	-	-	-	-	-	-	-	-	-
Gloeobacter kilaueensis JS1	Chromosome	NC_022600.1	-	-	1	-	-	-	-	-	-	-	-	-	-	-	-	-	-	-	-	-	-	-	-	-	-	-	-	-	-	-	-	-	-	-	1	-	-	-	-	-	-	-	-	-	-	-	-
Gloeobacter violaceus PCC 7421	Chromosome	NC_005125.1	-	-	1	-	-	-	-	-	-	-	-	-	-	-	-	-	-	-	-	-	-	-	-	-	-	-	-	1	-	-	-	-	-	-	1	-	-	-	-	-	1	-	-	-	-	-	-
Gloeocapsa sp. PCC 7428	Chromosome	NC_019745.1	-	1	-	-	1	-	-	-	-	-	-	-	-	-	-	-	-	-	-	-	-	-	-	-	-	-	-	-	-	-	-	-	-	-	-	-	-	-	-	1	-	-	-	-	-	-	-
Gloeomargarita lithophora Alchichica-D10	Chromosome	NZ_CP017675.1	1	-	1	-	-	-	-	-	-	-	-	-	-	-	-	-	-	-	-	-	-	-	-	-	-	-	-	-	-	-	-	-	-	-	-	-	-	-	-	-	-	-	-	-	-	-	-
Gloeothece citriformis PCC 7424	Chromosome	NC_011729.1	-	-	-	-	3	-	-	-	-	-	-	-	-	-	-	-	-	-	-	-	-	-	-	-	-	-	-	-	-	-	-	-	-	-	-	-	-	-	-	-	-	-	-	-	-	-	-
Gloeothece verrucosa PCC 7822	Chromosome	NC_014501.1	-	-	-	-	-	-	-	-	-	-	-	-	-	-	-	-	-	-	-	-	-	-	-	-	-	-	-	-	-	-	-	-	-	-	-	-	-	-	-	-	-	1	-	-	-	-	-
Halomicronema hongdechloris C2206	Chromosome	NZ_CP021983.2	-	-	-	-	1	-	-	-	-	-	-	-	-	-	-	-	-	-	-	-	-	1	-	-	-	-	-	-	-	-	-	-	-	-	-	-	-	-	-	-	-	-	-	-	-	-	-
Halothece sp. PCC 7418	Chromosome	NC_019779.1	-	-	-	-	1	-	-	-	1	-	-	-	-	-	-	-	-	-	-	-	-	-	-	-	-	-	-	-	-	-	-	-	-	-	-	-	-	-	-	-	-	-	-	-	-	-	-
Leptolyngbya boryana dg5	Chromosome	NZ_AP014642.1	-	-	-	-	2	-	-	-	-	-	-	-	-	-	-	1	-	-	-	-	-	-	-	-	-	-	-	-	-	-	-	-	-	-	-	-	-	-	-	-	-	-	-	-	-	-	-
Leptolyngbya boryana IAM M-101	Chromosome	NZ_AP014638.1	-	-	-	-	2	-	-	-	-	-	-	-	-	-	-	1	-	-	-	-	-	-	-	-	-	-	-	-	-	-	-	-	-	-	-	-	-	-	-	-	-	-	-	-	-	-	-
Leptolyngbya boryana NIES-2135	Chromosome	NZ_AP018203.1	-	-	-	-	2	-	-	-	-	-	-	-	-	-	-	1	-	-	-	-	-	-	-	-	-	-	-	-	-	-	-	-	-	-	-	-	-	-	-	-	-	-	-	-	-	-	-
Leptolyngbya sp. NIES-3755	Chromosome	NZ_AP017308.1	-	-	-	-	2	-	-	-	-	-	-	-	-	-	-	-	-	-	-	-	-	-	-	-	-	-	-	-	-	-	-	-	-	-	-	-	-	-	-	-	-	-	-	-	-	-	-
Leptolyngbya sp. O-77	Chromosome	NZ_AP017367.1	-	-	-	-	2	-	-	-	-	-	-	-	-	-	-	-	-	-	-	-	-	-	-	-	-	-	-	-	-	-	-	-	-	-	-	-	-	-	-	-	-	-	-	-	-	-	-
Leptolyngbya sp. PCC 7376	Chromosome	NC_019683.1	-	-	-	-	-	-	-	-	-	-	-	-	-	-	-	-	-	-	-	-	-	-	-	-	-	-	-	-	-	-	1	-	-	1	-	-	-	-	-	-	-	-	-	-	-	-	-
Limnospira indica PCC 8005	Chromosome	NZ_FO818640.1	-	-	-	-	1	-	1	-	-	-	-	-	-	-	-	-	-	-	-	-	-	-	-	-	-	-	-	-	-	-	-	-	-	-	-	-	-	-	-	-	-	-	-	-	-	-	-
Microcoleus sp. PCC 7113	Chromosome	NC_019738.1	-	-	-	-	1	-	-	-	-	-	-	-	-	-	-	-	-	-	-	-	-	-	-	-	-	-	-	-	-	-	-	-	-	-	-	-	-	-	-	-	-	-	-	-	-	-	-
Microcystis aeruginosa NIES-2481	Chromosome	NZ_CP012375.1	-	-	-	-	1	-	-	-	-	-	-	-	-	-	-	-	-	-	-	-	-	-	-	-	-	-	-	-	-	-	-	-	-	-	-	-	-	-	-	-	-	-	-	-	-	-	-
Microcystis aeruginosa NIES-2549	Chromosome	NZ_CP011304.1	-	-	-	-	1	-	-	-	-	-	-	-	-	-	-	-	-	-	-	-	-	-	-	-	-	-	-	-	-	-	-	-	-	-	-	-	-	-	-	-	-	-	-	-	-	-	-
Microcystis aeruginosa NIES-843	Chromosome	NC_010296.1	-	-	-	-	1	-	-	-	-	-	-	-	-	-	-	-	-	-	-	-	-	1	-	-	-	-	-	-	-	-	1	-	-	-	-	-	-	1	-	-	-	-	-	-	-	-	-
Microcystis aeruginosa PCC 7806SL	Chromosome	NZ_CP020771.1	-	-	-	-	1	-	1	-	-	-	-	-	-	-	-	-	-	-	-	-	-	-	-	-	-	-	-	-	-	-	-	-	-	-	-	-	-	-	-	-	-	-	-	-	-	-	-
Microcystis panniformis FACHB-1757	Chromosome	NZ_CP011339.1	-	-	-	-	2	-	-	-	-	-	-	-	-	-	-	-	-	-	-	-	-	-	-	-	-	-	-	-	-	-	1	-	-	-	-	-	-	1	-	-	-	-	-	-	-	-	-
Microcystis sp. MC19	Chromosome	NZ_CP020664.1	-	-	-	-	1	-	-	-	-	-	-	-	-	-	-	-	-	-	-	-	-	-	-	-	-	-	-	-	-	-	1	-	-	-	-	-	-	1	-	-	-	-	-	-	-	-	-
Microcystis viridis NIES-102	Chromosome	NZ_AP019314.1	-	-	-	-	1	-	-	-	-	-	-	-	-	-	-	-	-	-	-	-	-	1	-	-	-	-	-	-	-	-	1	-	-	-	-	-	-	-	-	-	-	-	-	-	-	-	-
Moorea producens JHB	Chromosome	NZ_CP017708.1	-	-	-	-	6	1	-	-	-	-	-	-	-	-	-	-	-	-	-	-	-	-	-	-	-	-	-	-	-	1	1	-	1	-	-	-	-	1	1	-	-	1	-	-	-	-	-
Moorea producens PAL-8-15-08-1	Chromosome	NZ_CP017599.1	-	-	-	-	5	-	-	-	1	-	-	-	-	-	-	1	-	-	-	-	-	-	-	-	1	-	-	-	1	-	3	-	-	-	-	-	-	-	1	-	-	1	-	-	-	-	-
Nodularia spumigena CCY9414	Chromosome	NZ_CP007203.1	-	-	-	-	1	-	-	-	-	-	-	-	-	-	-	-	-	-	-	-	-	-	-	1	-	-	-	-	-	-	2	-	-	-	1	-	-	-	-	1	-	-	-	-	-	-	-
Nodularia spumigena UHCC 0039	Chromosome	NZ_CP020114.1	-	-	-	-	2	-	-	-	-	-	-	-	-	-	-	-	-	-	-	-	-	-	-	1	-	-	-	-	-	-	2	-	-	-	1	-	-	-	-	1	-	-	-	-	-	-	-
Nostoc azollae 0708	Chromosome	NC_014248.1	-	-	-	-	-	-	-	-	-	-	-	-	-	-	-	-	-	-	-	-	-	-	-	-	-	-	-	-	-	-	-	-	-	-	1	-	-	-	-	1	-	-	-	-	-	1	-
Nostoc carneum NIES-2107	Chromosome	NZ_AP018180.1	-	-	-	-	2	-	-	-	2	-	-	-	-	-	-	-	-	-	-	-	-	-	-	-	-	-	-	-	-	-	1	-	-	-	-	-	-	-	-	1	-	-	-	-	-	-	-
Nostoc commune HK-02	Chromosome	AP018326.1	-	-	-	-	4	-	-	-	-	-	-	-	1	-	-	-	-	-	-	-	-	-	-	-	-	-	-	-	-	-	-	-	-	-	-	-	-	1	-	1	-	-	-	-	-	1	-
Nostoc flagelliforme CCNUN1	Chromosome	NZ_CP024785.1	-	-	-	-	2	-	-	-	-	-	-	-	-	-	-	-	-	-	-	-	-	-	-	-	-	-	-	-	-	-	-	-	-	-	-	-	-	-	-	1	-	-	-	-	-	-	-
Nostoc linckia NIES-25	Chromosome	NZ_AP018222.1	-	-	-	-	1	-	-	-	1	-	-	-	-	-	-	-	-	-	-	-	-	-	-	-	-	-	-	-	-	-	-	-	-	-	-	-	-	-	-	2	-	-	-	-	-	-	-
Nostoc piscinale CENA21	Chromosome	NZ_CP012036.1	-	-	-	-	4	-	-	-	-	-	-	-	-	-	-	-	-	-	-	-	-	-	-	-	-	-	-	-	-	-	-	-	-	-	-	-	-	-	-	1	-	-	-	-	-	-	-
Nostoc punctiforme PCC 73102	Chromosome	NC_010628.1	-	-	-	-	1	-	-	-	2	1	-	-	-	-	-	-	2	-	-	-	-	-	-	-	1	-	-	-	-	-	-	-	-	-	-	-	-	-	-	2	-	-	-	-	-	-	-
Nostoc sp. ATCC 53789	Chromosome	NZ_CP046703.1	-	-	-	-	1	-	-	-	1	-	-	-	-	-	-	-	-	-	-	-	-	-	-	-	1	-	-	-	-	-	-	-	-	-	1	-	-	-	-	1	-	-	-	-	-	-	-
Nostoc sp. CENA543	Chromosome	NZ_CP023278.1	-	-	-	-	2	-	-	-	1	-	-	-	-	-	-	-	-	-	-	-	-	-	-	1	-	-	-	-	-	-	-	-	-	-	-	-	-	-	-	1	-	-	-	-	-	1	-
Nostoc sp. HK-01	Chromosome	AP018318.1	-	-	-	-	3	-	-	-	-	-	-	-	-	-	-	-	-	-	-	-	-	-	-	-	-	-	-	-	-	-	-	-	-	-	-	-	-	-	-	1	-	-	-	-	-	-	-
Nostoc sp. 'Lobaria pulmonaria (5183) cyanobiont'	Chromosome	NZ_CP026692.1	-	-	-	-	2	-	-	-	-	-	-	-	-	-	-	-	-	-	-	-	-	-	-	-	-	-	-	-	-	-	-	-	-	-	-	-	-	-	-	1	-	-	-	-	-	-	-
Nostoc sp. NIES-2111	Chromosome	NZ_AP018184.1	-	-	-	-	2	-	-	-	1	-	-	-	-	-	-	-	-	-	-	-	-	-	-	-	-	-	-	-	-	1	-	-	-	-	-	-	-	-	-	1	-	-	1	-	-	1	-
Nostoc sp. NIES-3756	Chromosome	NZ_AP017295.1	-	-	-	-	2	-	-	-	1	-	-	-	-	-	-	-	-	-	-	-	-	-	-	-	-	-	-	-	-	1	-	-	-	-	-	-	-	-	-	1	-	-	1	-	-	1	-
Nostoc sp. NIES-4103	Chromosome	NZ_AP018288.1	-	-	-	-	4	-	-	-	2	-	-	-	-	-	-	-	-	-	-	-	-	-	-	-	-	-	-	-	1	-	-	-	-	-	1	-	-	-	-	1	-	-	1	-	-	-	-
Nostoc sp. PCC 7107	Chromosome	NC_019676.1	-	-	-	-	3	-	-	-	-	-	-	-	-	-	-	-	-	-	-	-	-	-	-	-	-	-	-	-	-	-	-	-	-	-	-	-	-	-	-	1	-	-	-	-	-	-	-
Nostoc sp. PCC 7120 = FACHB-418	Chromosome	NC_003272.1	-	-	-	-	1	-	-	-	1	-	-	-	-	-	-	-	-	-	-	-	-	-	-	-	-	-	-	-	-	-	-	-	-	-	-	-	-	1	-	1	-	-	-	-	-	1	-
Nostoc sp. PCC 7524	Chromosome	NC_019684.1	-	-	-	-	1	-	-	-	-	-	-	-	-	-	-	-	-	-	-	1	-	-	-	-	-	-	-	-	-	-	-	-	-	-	1	-	-	1	-	1	-	-	-	-	-	-	-
Nostoc sp. 'Peltigera membranacea cyanobiont' N6	Chromosome	NZ_CP026681.1	-	-	-	-	1	-	-	-	-	-	-	1	-	-	-	-	-	-	-	-	-	-	-	-	1	-	-	-	-	-	-	-	-	-	-	-	-	-	-	1	-	-	-	-	-	-	-
Nostoc sphaeroides Kutzing En	Chromosome	NZ_CP031941.1	-	-	-	-	3	-	-	-	-	-	-	-	-	-	-	-	-	-	-	-	-	-	-	-	-	-	-	-	-	-	-	-	-	-	-	-	-	-	-	1	-	-	-	-	-	-	-
Nostoc sphaeroides CCNUC1	Gxm2	NZ_CP045227.1	-	-	-	-	2	-	-	-	-	-	-	-	-	-	-	-	-	-	-	-	-	-	-	-	-	-	-	-	-	-	-	-	-	-	-	-	-	1	-	-	-	-	-	-	-	-	-
Nostoc sphaeroides CCNUC1	Gxm1	NZ_CP045226.1	-	-	-	-	3	-	-	-	-	-	-	-	-	-	-	-	-	-	-	-	-	-	-	-	-	-	-	-	-	-	-	-	-	-	-	-	-	-	-	1	-	-	-	-	-	-	-
Nostocales cyanobacterium HT-58-2	Chromosome	NZ_CP019636.1	-	-	-	-	2	-	-	-	-	-	-	-	1	-	-	-	-	-	-	-	-	-	-	-	-	-	-	-	-	-	-	-	-	-	-	-	-	-	-	1	-	-	-	-	-	-	-
Oscillatoria acuminata PCC 6304	Chromosome	NC_019693.1	-	-	-	-	2	-	-	-	-	-	-	-	-	-	-	-	-	-	-	-	-	-	-	-	-	-	-	-	-	-	-	-	-	-	-	-	-	-	-	-	-	-	-	-	-	-	-
Oscillatoria nigro-viridis PCC 7112	Chromosome	NC_019729.1	-	-	-	-	1	-	1	-	-	-	-	-	-	-	-	-	-	-	-	-	-	-	-	-	-	-	-	-	-	-	-	-	-	-	-	-	-	-	-	-	-	-	-	-	-	-	-
Oscillatoriales cyanobacterium JSC-12	Chromosome	NZ_CM001633.1	-	-	-	-	1	-	-	-	-	-	-	-	-	-	-	-	-	-	-	-	-	-	-	-	-	-	-	-	-	-	-	-	-	-	-	-	-	-	-	-	-	-	-	-	-	-	-
Planktothrix agardhii NIES-204	Chromosome	AP017991.1	-	-	-	-	-	-	-	-	-	-	-	-	-	-	-	-	-	-	-	-	-	-	-	-	1	-	-	-	-	-	1	-	-	-	-	-	-	-	-	-	-	-	-	-	-	1	-
Planktothrix agardhii NIVA-CYA 126/8	Chromosome	NZ_CM002803.1	-	-	-	-	-	-	-	-	-	-	-	-	-	-	-	-	-	-	-	-	-	-	-	1	-	-	-	-	-	-	1	-	-	-	-	-	-	-	-	-	-	-	-	-	-	1	-
Pleurocapsa sp. PCC 7327	Chromosome	NC_019689.1	-	-	-	-	2	-	-	-	-	-	-	-	-	-	-	-	-	-	-	-	-	-	-	-	-	-	-	-	-	-	-	-	-	-	-	-	-	-	-	-	-	-	-	-	-	-	-
Prochlorococcus marinus str. AS9601	Chromosome	NC_008816.1	-	-	-	-	1	-	-	-	-	-	-	-	-	-	-	-	-	-	-	-	-	-	-	-	-	-	-	-	-	-	-	-	-	-	-	-	-	-	-	-	-	-	-	-	-	-	-
Prochlorococcus marinus str. MIT 9211	Chromosome	NC_009976.1	-	-	-	-	2	-	-	-	-	-	-	-	-	-	-	-	-	-	-	-	-	-	-	-	-	-	-	-	-	-	-	-	-	-	-	-	-	-	-	-	-	-	-	-	-	-	-
Prochlorococcus marinus str. MIT 9215	Chromosome	NC_009840.1	-	-	-	-	2	-	-	-	-	-	-	-	-	-	-	-	-	-	-	-	-	-	-	-	-	-	-	-	-	-	-	-	-	-	-	-	-	-	-	-	-	-	-	-	-	-	-
Prochlorococcus marinus str. MIT 9301	Chromosome	NC_009091.1	-	-	-	-	1	-	-	-	-	-	-	-	-	-	-	-	-	-	-	-	-	-	-	-	-	-	-	-	-	-	-	-	-	-	-	-	-	-	-	-	-	-	-	-	-	-	-
Prochlorococcus marinus str. MIT 9303	Chromosome	NC_008820.1	-	-	-	-	16	-	-	-	-	-	-	-	-	-	-	-	-	-	2	-	1	-	-	-	-	-	-	-	-	-	-	-	-	-	-	-	-	-	-	-	-	-	-	-	-	-	-
Prochlorococcus marinus str. MIT 9312	Chromosome	NC_007577.1	-	-	-	-	1	-	-	-	-	-	-	-	-	-	-	-	-	-	-	-	-	-	-	-	-	-	-	-	-	-	-	-	-	-	-	-	-	-	-	-	-	-	-	-	-	-	-
Prochlorococcus marinus str. MIT 9313	Chromosome	NC_005071.1	-	-	-	-	11	-	-	-	1	-	-	-	-	-	-	-	-	-	1	-	1	-	-	-	-	-	-	-	-	-	-	-	-	-	-	-	-	-	-	-	-	-	-	-	-	-	-
Prochlorococcus marinus str. MIT 9515	Chromosome	NC_008817.1	-	-	-	-	2	-	-	-	-	-	-	-	-	-	-	-	-	-	-	-	-	-	-	-	-	-	-	-	-	-	-	-	-	-	-	-	-	-	-	-	-	-	-	-	-	-	-
Prochlorococcus marinus str. NATL1A	Chromosome	NC_008819.1	-	-	-	-	2	-	-	-	-	-	-	-	-	-	-	-	-	-	-	-	-	-	-	-	-	-	-	-	-	-	-	-	-	-	-	-	-	-	-	-	-	-	-	-	-	-	-
Prochlorococcus marinus str. NATL2A	Chromosome	NC_007335.2	-	-	-	-	2	-	-	-	-	-	-	-	-	-	-	-	-	-	-	-	-	-	-	-	-	-	-	-	-	-	-	-	-	-	-	-	-	-	-	-	-	-	-	-	-	-	-
Prochlorococcus marinus subsp. marinus str. CCMP1375	Chromosome	NC_005042.1	-	-	-	-	1	-	-	-	-	-	-	-	-	-	-	-	-	-	-	-	-	-	-	-	-	-	-	-	-	-	-	-	-	-	-	-	-	-	-	-	-	-	-	-	-	-	-
Prochlorococcus marinus subsp. pastoris str. CCMP1986	Chromosome	NC_005072.1	-	-	-	-	1	-	-	-	-	-	-	-	-	-	-	-	-	-	-	-	-	-	-	-	-	-	-	-	-	-	-	-	-	-	-	-	-	-	-	-	-	-	-	-	-	-	-
Prochlorococcus sp. MIT 0604	Chromosome	NZ_CP007753.1	-	-	-	-	1	-	-	-	-	-	-	-	-	-	-	-	-	-	-	-	-	-	-	-	-	-	-	-	-	-	-	-	-	-	-	-	-	-	-	-	-	-	-	-	-	-	-
Prochlorococcus sp. MIT 0801	Chromosome	NZ_CP007754.1	-	-	-	-	1	-	-	-	-	-	-	-	-	-	-	-	-	-	-	-	-	-	-	-	-	-	-	-	-	-	-	-	-	-	-	-	-	-	-	-	-	-	-	-	-	-	-
Prochlorococcus sp. RS01	Chromosome	NZ_CP018345.1	-	-	-	-	1	-	-	-	-	-	-	-	-	-	-	-	-	-	-	-	-	-	-	-	-	-	-	-	-	-	-	-	-	-	-	-	-	-	-	-	-	-	-	-	-	-	-
Prochlorococcus sp. RS04	Chromosome	NZ_CP018346.1	-	-	-	-	1	-	-	-	-	-	-	-	-	-	-	-	-	-	-	-	-	-	-	-	-	-	-	-	-	-	-	-	-	-	-	-	-	-	-	-	-	-	-	-	-	-	-
Prochlorococcus sp. RS50	Chromosome	NZ_CP018344.1	-	-	-	-	1	-	-	-	-	-	-	-	-	-	-	-	-	-	-	-	-	-	-	-	-	-	-	-	-	-	-	-	-	-	-	-	-	-	-	-	-	-	-	-	-	-	-
Pseudanabaena sp. ABRG5-3	Chromosome	NZ_AP017560.1	-	-	-	-	-	-	-	-	-	-	-	-	-	-	-	-	-	-	-	-	-	-	-	-	-	-	-	-	-	-	-	-	-	-	-	-	-	-	-	-	-	-	-	-	-	-	-
Pseudanabaena sp. PCC 7367	Chromosome	NC_019701.1	-	-	-	-	-	-	-	-	-	-	-	-	-	-	-	-	-	-	-	-	-	-	-	-	-	-	-	-	-	-	-	-	-	-	-	-	-	-	-	-	-	-	-	-	-	-	-
Raphidiopsis curvata NIES-932	Chromosome	NZ_AP018317.1	-	-	-	-	-	-	-	-	-	-	-	-	-	-	-	-	-	-	-	-	-	-	-	-	-	-	-	-	-	-	-	-	-	-	-	-	-	-	-	1	-	-	-	-	-	1	-
Rippkaea orientalis PCC 8801	Chromosome	NC_011726.1	-	-	-	-	1	-	-	-	-	-	-	-	-	-	-	-	-	-	-	-	-	-	-	-	-	-	-	-	-	-	-	-	-	-	-	-	-	-	-	-	-	-	-	-	-	-	-
Rippkaea orientalis PCC 8802	Chromosome	NC_013161.1	-	-	-	-	1	-	-	-	-	-	-	-	-	-	-	-	-	-	-	-	-	-	-	-	-	-	-	-	-	-	-	-	-	-	-	-	-	-	-	-	-	-	-	-	-	-	-
Rivularia sp. PCC 7116	Chromosome	NC_019678.1	-	-	-	-	1	-	-	1	1	-	-	-	-	1	-	-	-	-	-	-	-	-	-	-	-	-	-	-	-	-	-	-	-	-	-	-	-	-	-	1	-	-	1	-	-	1	-
Scytonema sp. HK-05	Chromosome	NZ_AP018194.1	-	-	-	-	1	-	-	-	-	-	-	-	-	-	-	-	-	-	-	-	-	-	-	-	1	-	-	-	-	-	-	-	-	-	-	-	-	-	-	1	-	-	1	-	-	-	-
Scytonema sp. NIES-4073	Chromosome	NZ_AP018268.1	-	-	-	-	3	-	-	-	1	-	-	-	-	-	-	-	-	-	-	-	-	-	-	-	-	-	-	-	-	-	-	-	-	-	-	-	-	-	-	1	-	-	1	-	-	-	-
Sphaerospermopsis kisseleviana NIES-73	Chromosome	NZ_AP018314.1	-	-	-	-	-	-	-	-	-	-	-	-	-	-	-	-	-	-	-	-	-	-	-	1	-	-	-	-	-	-	-	-	-	-	1	-	-	-	-	1	-	-	-	-	-	1	-
Stanieria cyanosphaera PCC 7437	Chromosome	NC_019748.1	-	-	-	-	1	-	-	-	-	-	-	-	-	-	-	-	-	-	-	-	-	-	-	-	-	1	-	-	-	-	-	-	-	-	-	-	-	-	-	-	-	-	-	-	-	-	-
Stanieria sp. NIES-3757	Chromosome	NZ_AP017375.1	-	-	-	-	-	-	-	-	-	-	-	-	-	-	-	-	-	-	-	-	-	-	-	-	-	-	-	-	-	-	-	-	-	-	-	-	-	-	-	-	-	-	-	-	-	-	-
Synechococcus elongatus PCC 11801	Chromosome	CP030139.1	-	-	-	-	1	-	-	-	-	-	-	-	-	-	-	-	-	-	-	-	-	-	-	-	-	-	-	-	-	-	-	-	-	-	-	-	-	-	-	-	-	-	-	-	-	-	-
Synechococcus elongatus PCC 11802	Chromosome	CP034671.1	-	-	-	-	1	-	-	-	-	-	-	-	-	-	-	-	-	-	-	-	-	-	-	-	-	-	-	-	-	-	-	-	-	-	-	-	-	-	-	-	-	-	-	-	-	-	-
Synechococcus elongatus PCC 6301	Chromosome	NC_006576.1	-	-	-	-	1	-	-	-	-	-	-	-	-	-	-	-	-	-	-	-	-	-	-	-	-	-	-	-	-	-	-	-	-	-	-	-	-	-	-	-	-	-	-	-	-	-	-
Synechococcus elongatus PCC 7942 = FACHB-805	Chromosome	NC_007604.1	-	-	-	-	1	-	-	-	-	-	-	-	-	-	-	-	-	-	-	-	-	-	-	-	-	-	-	-	-	-	-	-	-	-	-	-	-	-	-	-	-	-	-	-	-	-	-
Synechococcus elongatus UTEX 3055	Chromosome	NZ_CP033061.1	-	-	-	-	1	-	-	-	-	-	-	-	-	-	-	-	-	-	-	-	-	-	-	-	-	-	-	-	-	-	-	-	-	-	-	-	-	-	-	-	-	-	-	-	-	-	-
Synechococcus lividus PCC 6715	Chromosome	NZ_CP018092.1	-	-	-	-	-	-	-	-	-	-	-	-	-	-	-	-	-	-	-	-	-	-	-	-	-	-	-	-	-	-	-	-	-	-	-	-	-	-	-	-	-	-	-	-	-	-	-
Synechococcus sp. CB0101	Chromosome	NZ_CP039373.1	-	-	-	-	12	-	-	-	-	-	-	-	-	-	-	-	-	-	-	-	-	-	-	-	-	-	-	-	-	-	-	-	-	-	-	-	-	-	-	-	-	-	-	-	-	-	-
Synechococcus sp. CC9311	Chromosome	NC_008319.1	-	-	-	-	8	-	-	-	-	-	-	-	-	-	-	-	-	-	1	-	-	-	-	-	-	-	-	-	-	-	-	-	-	-	-	-	-	-	-	-	-	-	-	-	-	-	-
Synechococcus sp. CC9605	Chromosome	NC_007516.1	-	-	-	-	5	-	-	-	-	-	-	-	-	-	-	-	-	-	1	-	-	-	-	-	-	-	-	-	-	-	-	-	-	-	-	-	-	-	-	-	-	-	-	-	-	-	-
Synechococcus sp. CC9902	Chromosome	NC_007513.1	-	-	-	-	8	-	-	-	-	-	-	-	-	-	-	-	-	-	-	-	-	-	-	-	-	-	-	-	-	-	-	-	-	-	-	-	-	-	-	-	-	-	-	-	-	-	-
Synechococcus sp. JA-2-3B'a(2-13)	Chromosome	NC_007776.1	-	-	-	-	-	-	-	-	-	-	-	-	-	-	-	-	-	-	-	-	-	-	-	-	-	-	-	-	-	-	-	-	-	-	-	-	-	-	-	-	-	-	-	-	-	-	-
Synechococcus sp. JA-3-3Ab	Chromosome	NC_007775.1	-	-	-	-	-	-	-	-	-	-	-	-	-	-	-	-	-	-	-	-	-	-	-	-	-	-	-	-	-	-	-	-	-	-	-	-	-	-	-	-	-	-	-	-	-	-	-
Synechococcus sp. KORDI-100	Chromosome	NZ_CP006269.1	-	-	-	-	8	-	-	-	-	-	1	-	-	-	-	-	-	-	1	-	-	-	-	-	-	-	-	-	-	-	-	-	-	-	-	-	-	-	-	-	-	-	-	-	-	-	-
Synechococcus sp. KORDI-49	Chromosome	NZ_CP006270.1	-	-	-	-	3	-	-	-	-	-	-	-	-	-	-	-	-	-	1	-	-	-	-	-	-	-	-	-	-	-	-	-	-	-	-	-	-	-	-	-	-	-	-	-	-	-	-
Synechococcus sp. KORDI-52	Chromosome	NZ_CP006271.1	-	-	-	-	4	-	-	-	-	-	-	-	-	-	-	-	-	-	1	-	-	-	-	-	-	-	-	-	-	-	-	-	-	-	-	-	-	-	-	-	-	-	-	-	-	-	-
Synechococcus sp. NIES-970	Chromosome	NZ_AP017959.1	-	-	-	-	-	-	-	-	-	-	-	-	-	-	-	-	-	-	-	-	-	-	-	-	-	-	-	-	-	-	-	-	-	-	-	-	-	-	-	-	-	-	-	-	-	-	-
Synechococcus sp. PCC 11901	Chromosome	NZ_CP040360.1	-	-	-	-	-	-	-	-	-	-	-	-	-	-	-	-	-	-	-	-	-	-	-	-	-	-	-	-	-	-	-	-	-	-	-	-	-	-	-	-	-	-	-	-	-	-	-
Synechococcus sp. PCC 6312	Chromosome	NC_019680.1	-	-	-	-	-	-	-	-	-	-	-	-	-	-	-	-	-	-	-	-	-	-	-	-	-	-	-	-	-	-	-	-	-	-	-	-	-	-	-	-	-	-	-	-	-	-	-
Synechococcus sp. PCC 7002	Chromosome	NC_010475.1	-	-	-	-	-	-	-	-	-	-	-	-	-	-	-	-	-	-	-	-	-	-	-	-	-	-	-	-	-	-	-	-	-	-	-	-	-	-	-	-	-	-	-	-	-	-	-
Synechococcus sp. PCC 7003	Chromosome	NZ_CP016474.1	-	-	-	-	-	-	-	-	-	-	-	-	-	-	-	-	-	-	-	-	-	-	-	-	-	-	-	-	-	-	-	-	-	-	-	-	-	-	-	-	-	-	-	-	-	-	-
Synechococcus sp. PCC 7117	Chromosome	NZ_CP016477.1	-	-	-	-	-	-	-	-	-	-	-	-	-	-	-	-	-	-	-	-	-	-	-	-	-	-	-	-	-	-	-	-	-	-	-	-	-	-	-	-	-	-	-	-	-	-	-
Synechococcus sp. PCC 73109	Chromosome	NZ_CP013998.1	-	-	-	-	-	-	-	-	-	-	-	-	-	-	-	-	-	-	-	-	-	-	-	-	-	-	-	-	-	-	-	-	-	-	-	-	-	-	-	-	-	-	-	-	-	-	-
Synechococcus sp. PCC 7336	Chromosome	NZ_CM001776.1	-	-	-	-	2	-	-	-	-	-	-	-	-	-	-	-	-	-	-	-	-	-	-	-	-	-	1	-	-	-	-	-	-	1	-	-	-	-	-	-	-	-	-	-	-	-	-
Synechococcus sp. PCC 7502	Chromosome	NC_019702.1	-	-	-	-	-	-	-	-	-	-	-	-	-	-	-	-	-	-	-	-	-	-	-	-	-	-	-	-	-	-	-	-	-	-	-	-	-	-	-	-	-	-	-	-	-	1	-
Synechococcus sp. PCC 8807	Chromosome	NZ_CP016483.1	-	-	-	-	-	-	-	-	-	-	-	-	-	-	-	-	-	-	-	-	-	-	-	-	-	-	-	-	-	-	-	-	-	-	-	-	-	-	-	-	-	-	-	-	-	-	-
Synechococcus sp. RCC307	Chromosome	NC_009482.1	-	-	-	-	3	-	-	-	-	-	-	-	-	-	-	-	-	-	-	-	-	-	-	-	-	-	-	-	-	-	-	-	-	-	-	-	-	-	-	-	-	-	-	-	-	-	-
Synechococcus sp. RSCCF101	Chromosome	NZ_CP035632.1	-	-	-	-	2	-	-	-	-	-	-	-	-	-	-	-	-	-	-	-	-	-	-	-	-	-	-	-	-	-	-	-	-	-	-	-	-	-	-	-	-	-	-	-	-	-	-
Synechococcus sp. SynAce01	Chromosome	NZ_CP018091.1	-	-	-	-	4	-	-	-	-	-	-	-	-	-	-	-	-	-	-	-	-	-	-	-	-	-	-	-	-	-	-	-	-	-	-	-	-	-	-	-	-	-	-	-	-	-	-
Synechococcus sp. UTEX 2973	Chromosome	NZ_CP006471.1	-	-	-	-	1	-	-	-	-	-	-	-	-	-	-	-	-	-	-	-	-	-	-	-	-	-	-	-	-	-	-	-	-	-	-	-	-	-	-	-	-	-	-	-	-	-	-
Synechococcus sp. WH 7803	Chromosome	NC_009481.1	-	-	-	-	8	-	-	-	-	-	-	-	-	-	-	-	-	-	1	-	-	-	-	-	-	-	-	-	-	-	-	-	-	-	-	-	-	-	-	-	-	-	-	-	-	-	-
Synechococcus sp. WH 8020	Chromosome	NZ_CP011941.1	-	-	-	-	6	-	-	-	-	-	-	-	-	-	-	-	-	-	1	-	-	-	-	-	-	-	-	-	-	-	-	-	-	-	-	-	-	-	-	-	-	-	-	-	-	-	-
Synechococcus sp. WH 8101	Chromosome	NZ_CP035914.1	-	-	-	-	9	-	-	-	1	-	-	-	-	-	-	-	-	-	1	-	-	-	-	-	-	-	-	-	-	-	-	-	-	-	-	-	-	-	-	-	-	-	-	-	-	-	-
Synechococcus sp. WH 8102	Chromosome	NC_005070.1	-	-	-	-	5	-	-	-	-	-	-	-	-	-	-	-	-	-	1	-	-	-	-	-	-	-	-	-	-	-	-	-	-	-	-	-	-	-	-	-	-	-	-	-	-	-	-
Synechococcus sp. WH 8103	Chromosome	NZ_LN847356.1	-	-	-	-	5	-	-	-	-	-	-	-	-	-	-	-	-	-	1	-	-	-	-	-	-	-	-	-	-	-	-	-	-	-	-	-	-	-	-	-	-	-	-	-	-	-	-
Synechococcus sp. WH 8109	Chromosome	NZ_CP006882.1	-	-	-	-	4	-	-	-	-	-	-	-	-	-	-	-	-	-	-	-	-	-	-	-	-	-	-	-	-	-	-	-	-	-	-	-	-	-	-	-	-	-	-	-	-	-	-
Synechocystis sp. IPPAS B-1465	Chromosome	NZ_CP028094.1	-	-	-	-	-	-	-	-	-	-	-	-	-	-	-	-	-	-	-	-	-	-	-	-	-	-	-	-	-	-	-	-	-	-	-	-	-	-	-	-	-	-	-	-	-	-	-
Synechocystis sp. PCC 6714	Chromosome	NZ_CP007542.1	-	-	-	-	-	-	-	-	-	-	-	-	-	-	-	-	-	-	-	-	-	-	-	-	-	-	-	-	-	-	-	-	-	-	-	-	-	-	-	-	-	-	-	-	-	-	-
Synechocystis sp. PCC 6803	Chromosome	NC_000911.1	-	-	-	-	-	-	-	-	-	-	-	-	-	-	-	-	-	-	-	-	-	-	-	-	-	-	-	-	-	-	-	-	-	-	-	-	-	-	-	-	-	-	-	-	-	-	-
Synechocystis sp. PCC 6803	Chromosome	NC_020286.1	-	-	-	-	-	-	-	-	-	-	-	-	-	-	-	-	-	-	-	-	-	-	-	-	-	-	-	-	-	-	-	-	-	-	-	-	-	-	-	-	-	-	-	-	-	-	-
Synechocystis sp. PCC 6803	Chromosome	NZ_CP012832.1	-	-	-	-	-	-	-	-	-	-	-	-	-	-	-	-	-	-	-	-	-	-	-	-	-	-	-	-	-	-	-	-	-	-	-	-	-	-	-	-	-	-	-	-	-	-	-
Synechocystis sp. PCC 6803 (GT-S)	Chromosome	NC_017277.1	-	-	-	-	-	-	-	-	-	-	-	-	-	-	-	-	-	-	-	-	-	-	-	-	-	-	-	-	-	-	-	-	-	-	-	-	-	-	-	-	-	-	-	-	-	-	-
Synechocystis sp. PCC 6803 substr. GT-I	Chromosome	NC_017038.1	-	-	-	-	-	-	-	-	-	-	-	-	-	-	-	-	-	-	-	-	-	-	-	-	-	-	-	-	-	-	-	-	-	-	-	-	-	-	-	-	-	-	-	-	-	-	-
Synechocystis sp. PCC 6803 substr. PCC-N	Chromosome	NC_017052.1	-	-	-	-	-	-	-	-	-	-	-	-	-	-	-	-	-	-	-	-	-	-	-	-	-	-	-	-	-	-	-	-	-	-	-	-	-	-	-	-	-	-	-	-	-	-	-
Synechocystis sp. PCC 6803 substr. PCC-P	Chromosome	NC_017039.1	-	-	-	-	-	-	-	-	-	-	-	-	-	-	-	-	-	-	-	-	-	-	-	-	-	-	-	-	-	-	-	-	-	-	-	-	-	-	-	-	-	-	-	-	-	-	-
Thermosynechococcus elongatus BP-1	Chromosome	NC_004113.1	-	-	-	-	-	-	-	-	-	-	-	-	-	-	-	-	-	-	-	-	-	-	-	-	-	-	-	-	-	-	-	-	-	-	-	-	-	-	-	-	-	-	-	-	-	-	-
Thermosynechococcus elongatus PKUAC-SCTE542	Chromosome	CP032152.1	-	-	-	-	-	-	-	-	-	-	-	-	-	-	-	-	-	-	-	-	-	-	-	-	-	-	-	-	-	-	-	-	-	-	-	-	-	-	-	-	-	-	-	-	-	-	-
Thermosynechococcus sp. CL-1	Chromosome	NZ_CP040671.1	-	-	-	-	-	-	-	-	-	-	-	-	-	-	-	-	-	-	-	-	-	-	-	-	-	-	-	-	-	-	-	-	-	-	-	-	-	-	-	-	-	-	-	-	-	-	-
Thermosynechococcus sp. NK55a	Chromosome	NC_023033.1	-	-	-	-	-	-	-	-	-	-	-	-	-	-	-	-	-	-	-	-	-	-	-	-	-	-	-	-	-	-	-	-	-	-	-	-	-	-	-	-	-	-	-	-	-	-	-
Thermosynechococcus vulcanus NIES-2134	Chromosome	NZ_AP018202.1	-	-	-	-	-	-	-	-	-	-	-	-	-	-	-	-	-	-	-	-	-	-	-	-	-	-	-	-	-	-	-	-	-	-	-	-	-	-	-	-	-	-	-	-	-	-	-
Tolypothrix tenuis PCC 7101	Chromosome	NZ_AP018248.1	-	-	-	-	2	-	-	-	-	-	-	-	-	-	-	-	-	-	-	-	-	-	-	-	-	-	-	-	-	-	1	-	-	-	-	-	-	-	-	1	-	-	-	-	-	-	-
Trichodesmium erythraeum IMS101	Chromosome	NC_008312.1	-	-	-	-	-	-	1	-	-	-	-	-	-	-	-	-	-	-	-	-	-	-	-	-	-	-	-	-	-	-	-	-	-	-	-	-	-	-	-	-	-	-	-	-	-	-	-
Trichormus variabilis ATCC 29413	Chromosome	NC_007413.1	-	-	-	-	1	-	-	-	-	-	-	-	-	-	-	-	-	1	-	-	-	-	-	-	-	-	-	-	-	-	-	-	-	-	-	-	-	1	-	1	-	-	-	-	-	1	-
Trichormus variabilis NIES-23	Chromosome	NZ_AP018216.1	-	-	-	-	1	-	-	-	1	-	-	-	-	-	-	-	-	-	-	-	-	-	-	-	-	-	-	-	-	-	-	-	-	-	-	-	-	1	-	1	-	-	-	-	-	1	-
Total			1	1	6	1	334	2	9	2	26	1	1	1	2	1	1	7	2	2	15	1	2	4	1	5	8	2	1	1	2	3	25	1	1	2	18	2	2	11	2	57	1	4	14	1	1	19	1
[truncated: 55 more columns]

## Sheet: Plasmids
Genome	Name	Accession number	Plasmid size (bp)	Bacteriocin	Bacteriocin, Lanthipeptide	Bacteriocin, lassopeptide	Bacteriocin, NRPS, other, T1PKS	Betalactone, NRPS, T1PKS	Bacteriocin, TfaA-related	Cyanobactin	Cyanobactin, LAP	Ectoine	hglE-KS, NRPS, resorcinol, T1PKS	Indole	Lanthipeptide	LAP	Lassopeptide	Microviridin	Microviridin, NRPS, T1PKS	NRPS	NRPS, terpene	NRPS, transAT-PKS-like, T1PKS	NRPS, T1PKS	Nucleoside	Resorcinol	Siderophore	Terpene	TfuA-relate, thipeptide	Thiopeptide	T1PKS	Total BGCs	Known NP			NRPS	PKS	NRPS/PKS	Terpene	RIPPs	Others
Acaryochloris marina MBIC11017	pREB1	NC_009926.1	374161	-	-	-	-	-	-	-	-	-	-	-	-	-	-	-	-	-	-	-	1	-	-	-	-	-	-	-	1	-			-	-	1	-	0	0
Acaryochloris marina MBIC11017	pREB2	NC_009927.1	356087	-	-	-	-	-	-	1	-	-	-	-	-	-	-	-	-	-	-	-	-	-	-	-	-	-	-	-	1	-			-	-	-	-	1	0
Anabaena cylindrica PCC 7122	pANACY.4	NC_019774.1	97606	1	-	-	-	-	-	-	-	-	-	-	-	-	-	-	-	-	-	-	-	-	-	-	-	-	-	-	1	-			-	-	-	-	1	0
Anabaena cylindrica PCC 7122	plasmid3	NZ_AP018169.1	93804	1	-	-	-	-	-	-	-	-	-	-	-	-	-	-	-	-	-	-	-	-	-	-	-	-	-	-	1	-			-	-	-	-	1	0
Anabaena sp. WA102	unnamed	NZ_CP011457.1	76597	-	-	-	-	-	-	-	-	-	-	-	-	-	-	-	-	1	-	-	-	-	-	-	-	-	-	-	1	-			1	-	-	-	0	0
Aulosira laxa NIES-50	plasmid1	NZ_AP018308.1	292325	-	-	-	-	-	-	-	-	-	-	-	-	-	-	-	-	-	-	-	1	-	-	-	-	-	-	-	1	HAS*			-	-	1	-	0	0
Calothrix brevissima NIES-22	plasmid1	NZ_AP018208.1	157982	-	-	-	-	-	-	-	-	-	-	-	-	-	-	-	-	1	-	-	-	-	-	-	-	-	-	-	1	-			1	-	-	-	0	0
Calothrix brevissima NIES-22	plasmid4	NZ_AP018211.1	190194	-	-	-	-	-	-	-	-	-	-	-	-	-	-	-	-	-	-	-	-	-	-	-	-	-	-	1	1	-			-	1	-	-	0	0
Calothrix sp. NIES-2098	plasmid1	NZ_AP018217.1	391340	-	-	-	-	-	-	-	-	-	-	-	-	-	-	1	-	-	-	-	-	-	-	-	-	-	-	-	1	-			-	-	-	-	1	0
Calothrix sp. NIES-4071	plasmid2	NZ_AP018257.1	365907	1	-	-	-	-	-	-	-	-	-	-	-	-	-	-	-	-	-	-	-	-	-	-	-	-	-	-	1	-			-	-	-	-	1	0
Calothrix sp. NIES-4101	plasmid4	AP018277.1	126615	-	-	-	-	-	-	-	-	-	-	1	-	-	-	-	-	-	-	-	-	-	-	-	-	-	-	-	1	-			-	-	-	-	0	1
Calothrix sp. NIES-4105	plasmid2	NZ_AP018292.1	365907	1	-	-	-	-	-	-	-	-	-	-	-	-	-	-	-	-	-	-	-	-	-	-	-	-	-	-	1	-			-	-	-	-	1	0
Calothrix sp. PCC 6303	pCAL6303.01	NC_019727.1	80757	-	-	-	-	-	-	-	-	-	-	-	-	-	-	-	-	-	-	-	-	-	-	-	-	-	1	-	1	-			-	-	-	-	1	0
Crinalium epipsammum PCC 9333	pCRI9333.01	NC_019733.1	54978	-	-	-	-	-	-	-	-	-	-	-	-	-	-	-	-	-	-	-	1	-	-	-	-	-	-	-	1	-			-	-	1	-	0	0
Cyanothece sp. PCC 7425	pP742501	NC_011880.1	196837	1	-	-	-	-	-	-	-	-	-	-	-	-	-	-	-	-	-	-	-	-	-	-	-	-	-	-	1	-			-	-	-	-	1	0
Cylindrospermum sp. NIES-4074	plasmid2	AP018272.1	261073	-	-	-	-	-	-	-	-	-	-	-	-	-	-	-	-	-	-	-	1	-	-	-	-	-	-	-	1	-			-	-	1	-	0	0
Cylindrospermum sp. NIES-4074	plasmid3	AP018273.1	220013	-	-	-	-	-	-	-	-	-	-	-	-	-	1	-	-	-	-	-	-	-	-	-	-	-	-	-	1	-			-	-	-	-	1	0
Cylindrospermum sp. NIES-4074	plasmid1	AP018270.1	340655	-	-	-	-	-	-	-	-	-	-	-	-	-	-	-	-	-	-	-	2	-	-	-	-	-	-	-	2	AER*			-	-	2	-	0	0
Cylindrospermum stagnale PCC 7417	pCYLST.01	NC_020050.1	431821	-	-	-	-	-	-	-	-	-	-	-	-	-	-	-	-	-	-	-	1	-	-	-	-	-	-	-	1	-			-	-	1	-	0	0
Fischerella sp. NIES-4106	plasmid2	NZ_AP018300.1	312401	-	-	-	-	-	-	-	-	-	-	-	-	-	-	-	-	-	1	-	-	-	-	-	-	-	-	-	1	-			-	-	-	-	0	1
Fischerella sp. NIES-4106	plasmid1	NZ_AP018299.1	550801	-	-	-	1	-	-	-	-	-	-	-	-	-	-	-	1	1	-	-	1	-	-	-	-	-	-	-	4	AMB, MCY			1	-	1	-	0	2
Fremyella diplosiphon NIES-3275	plasmid4	NZ_AP018237.1	175368	-	-	-	-	-	-	-	-	-	-	-	-	-	-	-	-	-	-	-	-	-	-	-	-	-	-	1	1	-			-	1	-	-	0	0
Gloeocapsa sp. PCC 7428	pGLO7428.01	NC_019746.1	937246	-	-	-	-	-	-	1	-	-	-	-	-	-	-	-	-	-	-	-	2	-	-	-	-	-	-	-	3	-			-	-	2	-	1	0
Gloeothece citriformis PCC 7424	pP742401	NC_011738.1	328635	-	-	-	-	-	-	-	-	-	-	-	-	-	-	-	-	2	-	-	-	-	-	-	-	-	-	-	2	APT*			2	-	-	-	0	0
Gloeothece verrucosa PCC 7822	Cy782202	NC_014534.1	473846	-	-	-	-	-	-	-	1	-	-	-	-	-	-	-	-	-	-	-	-	1	-	-	-	-	-	-	2	-			-	-	-	-	1	1
Gloeothece verrucosa PCC 7822	Cy782201	NC_014533.1	879545	-	-	-	-	-	-	-	-	1	-	-	-	1	-	-	-	2	-	-	1	-	-	-	-	-	-	-	5	APT*			2	-	1	-	1	1
Leptolyngbya boryana IAM M-101	pLBX	NZ_AP014640.1	1111190	-	-	-	-	-	-	-	-	-	-	-	-	-	-	-	-	-	-	-	1	-	-	-	-	-	-	-	1	-			-	-	1	-	0	0
Leptolyngbya boryana NIES-2135	plasmid2	NZ_AP018205.1	553673	-	-	-	-	-	-	-	-	-	-	-	-	-	-	-	-	-	-	-	1	-	-	-	-	-	-	-	1	-			-	-	1	-	0	0
Leptolyngbya sp. NIES-3755	plasmid2	NZ_AP017310.1	98206	-	-	-	-	-	-	-	-	-	-	-	-	-	-	-	-	1	-	-	1	-	-	-	-	-	-	-	2	-			1	-	1	-	0	0
Nostoc carneum NIES-2107	plasmid2	NZ_AP018182.1	221468	-	-	-	-	-	-	-	-	-	-	-	-	-	-	-	-	1	-	-	-	-	-	-	-	-	-	-	1	-			1	-	-	-	0	0
Nostoc carneum NIES-2107	plasmid3	NZ_AP018183.1	231372	-	-	-	-	-	-	-	-	-	-	-	-	-	-	-	-	2	-	-	-	-	-	-	-	-	-	-	2	-			2	-	-	-	0	0
Nostoc commune HK-02	plasmid1	AP018327.1	865749	2	-	-	-	-	-	-	-	-	-	-	-	-	-	-	-	-	-	-	-	-	-	-	-	-	-	-	2	-			-	-	-	-	2	0
Nostoc flagelliforme CCNUN1	pNFSY04	NZ_CP024789.1	144585	-	-	-	-	-	-	-	-	-	-	-	-	-	-	-	-	-	-	-	1	-	-	-	-	-	-	-	1	-			-	-	1	-	0	0
Nostoc flagelliforme CCNUN1	pNFSY07	NZ_CP024792.1	327173	1	-	-	-	-	-	-	-	-	1	-	-	-	-	-	-	-	-	-	-	-	-	-	-	-	-	-	2	-			-	-	-	-	1	1
Nostoc flagelliforme CCNUN1	pNFSY08	NZ_CP024793.1	805120	-	-	-	-	-	-	-	-	-	-	-	-	-	-	-	-	-	-	-	-	-	1	-	-	-	-	-	1	-			-	-	-	-	0	1
Nostoc linckia NIES-25	plasmid1	NZ_AP018223.1	1784048	-	-	-	-	-	-	-	-	-	-	-	-	-	-	-	-	1	-	-	-	-	-	-	1	1	-	-	3	GEO			1	-	-	1	0	1
Nostoc punctiforme PCC 73102	pNPUN01	NC_010631.1	354564	-	1	-	-	-	-	-	-	-	-	-	-	-	-	-	-	-	-	-	-	-	-	-	-	-	-	-	1	-			-	-	-	-	1	0
Nostoc punctiforme PCC 73102	pNPUN03	NC_010630.1	123028	-	-	-	-	-	-	-	-	-	-	-	-	-	-	-	-	-	-	-	1	-	-	-	-	-	-	-	1	-			-	-	1	-	0	0
Nostoc punctiforme PCC 73102	pNPUN05	NC_010629.1	26419	1	-	-	-	-	-	-	-	-	-	-	-	-	-	-	-	-	-	-	-	-	-	-	-	-	-	-	1	-			-	-	-	-	1	0
Nostoc sp. ATCC 53789	pNsp_a	NZ_CP046704.1	337072	-	-	1	-	-	-	-	-	-	-	-	-	-	-	-	-	-	-	-	-	-	-	-	-	-	-	-	1	-			-	-	-	-	1	0
Nostoc sp. ATCC 53789	pNsp_b	NZ_CP046705.1	325114	-	1	-	-	-	-	-	-	-	-	-	-	-	-	-	-	-	-	-	-	-	-	-	-	-	-	-	1	-			-	-	-	-	1	0
Nostoc sp. ATCC 53789	pNsp_d	NZ_CP046707.1	65222	1	-	-	-	-	-	-	-	-	-	-	-	-	-	-	-	-	-	-	-	-	-	-	-	-	-	-	1	-			-	-	-	-	1	0
Nostoc sp. ATCC 53789	pNsp_c	NZ_CP046706.1	219530	-	-	-	-	-	-	-	-	-	-	-	-	-	-	-	-	-	-	-	2	-	-	-	-	-	-	-	2	CRY			-	-	2	-	0	0
Nostoc sp. 'Lobaria pulmonaria (5183) cyanobiont'	pNLP2	NZ_CP026694.1	63064	-	-	-	-	-	-	-	-	-	-	-	-	-	-	-	-	-	-	-	1	-	-	-	-	-	-	-	1	-			-	-	1	-	0	0
Nostoc sp. NIES-2111	plasmid3	NZ_AP018187.1	328926	-	-	-	-	-	-	-	-	-	-	-	-	-	-	-	-	-	-	-	1	-	-	-	-	-	-	-	1	-			-	-	1	-	0	0
Nostoc sp. NIES-2111	plasmid2	NZ_AP018186.1	320476	-	-	-	-	-	-	-	-	-	-	-	-	-	-	-	-	2	-	-	-	-	-	-	1	-	-	-	3	GEO			2	-	-	1	0	0
Nostoc sp. NIES-3756	pNOS3756_1	NZ_AP017296.1	447304	-	-	-	-	-	-	-	-	-	-	-	-	-	-	-	-	2	-	-	1	-	-	-	-	-	-	-	3	-			2	-	1	-	0	0
Nostoc sp. NIES-4103	plasmid1	NZ_AP018289.1	170638	-	-	-	-	-	-	-	-	-	-	-	-	1	-	-	-	-	-	-	-	-	-	-	-	-	-	-	1	-			-	-	-	-	1	0
Nostoc sp. PCC 7120 = FACHB-418	pCC7120alpha	NC_003276.1	408101	-	-	-	-	-	-	-	-	-	-	-	-	-	-	1	-	-	-	-	-	-	-	-	-	-	-	-	1	-			-	-	-	-	1	0
Nostoc sphaeroides Kutzing Em	p2	NZ_CP031943.1	39542	-	-	-	-	-	-	-	-	-	-	-	-	-	-	-	-	-	-	-	-	-	-	-	1	-	-	-	1	-			-	-	-	1	0	0
Nostoc sphaeroides CCNUC1	pGXM01	NZ_CP045228.1	274358	-	-	-	-	-	-	-	-	-	-	-	-	-	-	-	-	1	-	-	-	-	-	-	-	-	-	-	1	-			1	-	-	-	0	0
Nostoc sphaeroides CCNUC1	pGXM02	NZ_CP045229.1	216837	-	-	-	-	-	-	-	-	-	-	-	-	-	-	-	-	-	-	-	1	-	-	-	-	-	-	-	1	-			-	-	1	-	0	0
Nostoc sphaeroides CCNUC1	pGXM04	NZ_CP045231.1	42048	-	-	-	-	-	1	-	-	-	-	-	-	-	-	-	-	-	-	-	-	-	-	-	-	-	-	-	1	-			-	-	-	-	0	1
Oscillatoria acuminata PCC 6304	pOSCIL6304.01	NC_019700.1	64128	-	-	-	-	-	-	-	-	-	-	-	-	-	-	-	-	1	-	-	-	-	-	-	-	-	-	-	1	-			1	-	-	-	0	0
Planktothrix agardhii NIES-204	plasmid2	AP017993.1	99115	-	-	-	-	-	-	-	-	-	-	-	-	-	-	-	-	-	-	1	-	-	-	-	-	-	-	1	2	-			-	1	-	-	0	1
Planktothrix agardhii NIVA-CYA 126/8	pPA115	NZ_CM002804.1	119569	1	-	-	-	-	-	-	-	-	-	-	-	-	-	-	-	-	-	-	-	-	-	-	-	-	-	-	1	-			-	-	-	-	1	0
Planktothrix agardhii NIVA-CYA 126/8	pPA79	NZ_CM002808.1	79106	-	-	-	-	-	-	-	-	-	-	-	-	-	-	-	-	-	-	1	-	-	-	-	-	-	-	-	1	-			-	-	-	-	0	1
Pseudanabaena sp. ABRG5-3	ABRG53d	NZ_AP017564.1	125503	1	-	-	-	-	-	-	-	-	-	-	-	-	-	-	-	-	-	-	-	-	-	-	-	-	-	-	1	-			-	-	-	-	1	0
Pseudanabaena sp. ABRG5-3	ABRG53e	NZ_AP017565.1	111135	-	-	-	-	-	-	-	-	-	-	-	-	-	-	-	-	-	-	-	1	-	-	-	-	-	-	-	1	-			-	-	1	-	0	0
Pseudanabaena sp. ABRG5-3	ABRG53f	NZ_AP017566.1	39758	-	-	-	-	-	-	-	-	-	-	-	-	-	-	-	-	-	-	-	1	-	-	-	-	-	-	-	1	-			-	-	1	-	0	0
Scytonema sp. HK-05	plasmid1	NZ_AP018195.1	831926	1	-	-	-	1	-	-	-	-	-	-	-	-	-	-	1	-	-	-	-	-	-	-	-	-	-	-	3	APT			-	-	-	-	1	2
Scytonema sp. NIES-4073	plasmid2	NZ_AP018265.1	76644	-	-	-	-	-	-	-	-	-	-	-	-	-	-	-	-	1	-	-	-	-	-	-	-	-	-	-	1	-			1	-	-	-	0	0
Stanieria cyanosphaera PCC 7437	pSTA7437.02	NC_019749.1	2442379	1	-	-	-	-	-	-	-	-	-	-	-	-	-	-	-	-	-	-	-	-	-	-	-	-	-	-	1	-			-	-	-	-	1	0
Stanieria sp. NIES-3757	plasmid1	NZ_AP017376.1	143540	1	-	-	-	-	-	-	-	-	-	-	-	-	-	-	-	-	-	-	-	-	-	-	-	-	-	-	1	-			-	-	-	-	1	0
Synechococcus sp. NIES-970	plasmid1	NZ_AP017960.1	138469	-	-	-	-	-	-	-	-	-	-	-	-	-	-	-	-	-	-	-	-	-	-	1	-	-	-	-	1	-			-	-	-	-	0	1
Synechococcus sp. PCC 11901	unnamed1	NZ_CP040361.1	169328	-	-	-	-	-	-	-	-	-	-	-	-	-	-	-	-	-	-	-	-	-	-	1	-	-	-	-	1	-			-	-	-	-	0	1
Synechococcus sp. PCC 7002	pAQ7	NC_010474.1	186459	-	-	-	-	-	-	-	-	-	-	-	-	-	-	-	-	-	-	-	-	-	-	1	-	-	-	-	1	-			-	-	-	-	0	1
Synechococcus sp. PCC 7117	unnamed5	NZ_CP016482.1	264782	-	-	-	-	-	-	-	-	-	-	-	-	-	-	-	-	-	-	-	-	-	-	1	-	-	-	-	1	-			-	-	-	-	0	1
Leptolyngbya boryana dg5	pLBX	NZ_AP014644.1	504942	-	-	-	-	-	-	-	-	-	-	-	-	-	-	-	-	-	-	-	1	-	-	-	-	-	-	-	1	-			-	-	1	-	0	0
Tolypothrix tenuis PCC 7101	plasmid1	NZ_AP018249.1	292325	-	-	-	-	-	-	-	-	-	-	-	-	-	-	-	-	-	-	-	1	-	-	-	-	-	-	-	1	HAS*			-	-	1	-	0	0
Trichormus variabilis ATCC 29413	A	NC_007410.1	366354	-	-	-	-	-	-	-	-	-	-	-	1	-	-	-	-	-	-	-	-	-	-	-	-	-	-	-	1	-			-	-	-	-	1	0
Trichormus variabilis ATCC 29413	C	NC_007412.1	300758	-	-	-	-	-	-	-	-	-	-	-	-	-	-	-	-	1	-	-	-	-	-	-	-	-	-	-	1	-			1	-	-	-	0	0
Trichormus variabilis NIES-23	plasmid1	NZ_AP018217.1	391340	-	-	-	-	-	-	-	-	-	-	-	-	-	-	1	-	-	-	-	-	-	-	-	-	-	-	-	1	-			-	-	-	-	1	0
Total				15	2	1	1	1	1	2	1	1	1	1	1	2	1	3	2	20	1	2	26	1	1	4	3	1	1	3	99				20	3	26	3	29	18
