# Supplementary material for: Mining of Cyanobacterial Genomes Indicates That Plasmids Are Involved in the Production of Natural Products
Source: Research Square preprint supplement (doi:10.21203/rs.3.rs-121751/v1), 2020-12-11
Supplement: Supplementary file 3 [file b0b011ed9c9ceca1d9eb4872.xlsx]

## Sheet: Genomic DNA
Genome	Acession number	Chr size (Mb)	Pld size (Mb)	% of DNA in Chr	% of DNA in Pld
Acaryochloris marina MBIC11017	GCA_000018105.1	6.5	1.86	77.7512	2.33635
Anabaena cylindrica PCC 7122	GCA_000317695.1	6.4	0.54	92.219	0.582154
Anabaena cylindrica PCC 7122	GCA_002367955.1	6.35	0.67	90.4558	0.735247	Legend
Anabaena sp. 90	GCA_000312705.1	4.33	0.98	81.5443	1.18753	Chr	Chromosome
Anabaena sp. WA102	GCA_001277295.1	5.71	0.08	98.6183	0.0810551	Pld	Plasmid
Anabaena sp. YBS01	GCA_009498015.1	7.01	0	100	0
Anabaenopsis circularis NIES-21	GCA_002367975.1	6.57	0.49	93.0595	0.523787
Arthrospira platensis C1	GCA_000307915.1	6.09	0	100	0
Arthrospira platensis NIES-39	GCA_000210375.1	6.79	0	100	0
Arthrospira platensis YZ	GCA_001611905.1	6.52	0	100	0
Aulosira laxa NIES-50	GCA_002368055.1	8.46	0.9	90.3846	0.985927
Calothrix brevissima NIES-22	GCA_002367995.1	8.53	0.74	92.0173	0.797781
Calothrix parasitica NIES-267	GCA_002368095.1	8.95	0.54	94.3098	0.569321
Calothrix sp. 336/3	GCA_000734895.2	6.28	0.14	97.8193	0.142916
Calothrix sp. NIES-2098	GCA_002368175.1	8.66	0.22	97.5225	0.225081
Calothrix sp. NIES-2100	GCA_002368195.1	9.91	0.05	99.498	0.050227
Calothrix sp. NIES-3974	GCA_002368395.1	5.99	0	100	0
Calothrix sp. NIES-4071	GCA_002368455.1	11.07	0.97	91.9435	1.04398
Calothrix sp. NIES-4101	GCA_004296455.1	7.24	0.42	94.517	0.442399
Calothrix sp. NIES-4105	GCA_002368415.1	11.06	0.97	91.9368	1.04406
Calothrix sp. PCC 6303	GCA_000317435.1	6.77	0.2	97.1306	0.205485
Calothrix sp. PCC 7507	GCA_000316575.1	7.02	0	100	0
Candidatus Atelocyanobacterium thalassa isolate ALOHA	GCA_000025125.1	1.44	0	100	0
Candidatus Melainabacteria bacterium MEL.A1	GCA_001765415.1	1.87	0	100	0
Chamaesiphon minutus PCC 6605	GCA_000317145.1	6.28	0.48	92.8994	0.514032
Chondrocystis sp. NIES-4102	GCA_002368355.1	4.52	0.48	90.4	0.528169
Chroococcidiopsis thermalis PCC 7203	GCA_000317125.1	6.32	0.37	94.4694	0.390133
Crinalium epipsammum PCC 9333	GCA_000317495.1	5.32	0.24	95.6835	0.250199
Crocosphaera subtropica ATCC 51142	GCA_000017845.1	4.93	0.52	90.4587	0.571562
Cyanobacterium aponinum PCC 10605	GCA_000317675.1	4.11	0.06	98.5612	0.0608389
cyanobacterium endosymbiont of Epithemia turgida isolate EtSB Lake Yunoko	GCA_000829235.1	2.79	0	100	0
cyanobacterium endosymbiont of Rhopalodia gibberula	GCA_003574135.1	3.02	0	100	0
Cyanobacterium sp. HL-69	GCA_002813895.1	3.16	0.15	95.4683	0.156874
Cyanobacterium stanieri PCC 7202	GCA_000317655.1	3.16	0	100	0
Cyanobium gracile PCC 6307	GCA_000316515.1	3.34	0	100	0
Cyanobium sp. NIES-981	GCA_900088535.1	3.02	0	100	0
Cyanothece sp. PCC 7425	GCA_000022045.1	5.37	0.23	95.8929	0.239277
Cylindrospermum sp. NIES-4074	GCA_003994795.1	6.85	0.86	88.8457	0.958691
Cylindrospermum stagnale PCC 7417	GCA_000317535.1	7	0.6	92.1053	0.647212
Dactylococcopsis salina PCC 8305	GCA_000317615.1	3.78	0	100	0
Dolichospermum compactum NIES-806	GCA_002368115.1	5.17	0	100	0
Dolichospermum sp. UHCC 0315A	GCA_008121535.1	5.41	0.14	97.4775	0.143417
Euhalothece natronophila Z-M001	GCA_007904085.1	3.33	0.2	94.3343	0.211563
Fischerella sp. NIES-3754	GCA_001548455.1	5.82	0	100	0
Fischerella sp. NIES-4106	GCA_002368315.1	6.18	1.06	85.3591	1.22658
Fremyella diplosiphon NIES-3275	GCA_002368275.1	8.89	1.23	87.8458	1.38085
Geitlerinema sp. PCC 7407	GCA_000317045.1	4.68	0	100	0
Geminocystis herdmanii PCC 6308	GCA_000332235.1	4.26	0	100	0
Geminocystis sp. NIES-3708	GCA_001548095.1	3.88	0.17	95.8025	0.177134
Geminocystis sp. NIES-3709	GCA_001548115.1	4.15	0.28	93.6795	0.298001
Gloeobacter kilaueensis JS1	GCA_000484535.1	4.72	0	100	0
Gloeobacter violaceus PCC 7421	GCA_000011385.1	4.66	0	100	0
Gloeocapsa sp. PCC 7428	GCA_000317555.1	5.43	0.44	92.5043	0.473402
Gloeomargarita lithophora Alchichica-D10	GCA_001870225.1	3.05	0	100	0
Gloeothece citriformis PCC 7424	GCA_000021825.1	5.94	0.62	90.5488	0.680057
Gloeothece verrucosa PCC 7822	GCA_000147335.1	6.09	1.74	77.7778	2.18819
Halomicronema hongdechloris C2206	GCA_002075285.3	5.58	0	100	0
Halothece sp. PCC 7418	GCA_000317635.1	4.18	0	100	0
Leptolyngbya boryana dg5	GCA_002142495.1	6.18	0.62	90.8824	0.677578
Leptolyngbya boryana IAM M-101	GCA_002142475.1	6.18	0.62	90.8824	0.677578
Leptolyngbya boryana NIES-2135	GCA_002368255.1	6.26	0.97	86.5837	1.10789
Leptolyngbya sp. NIES-3755	GCA_001548435.1	6.24	0.52	92.3077	0.560178
Leptolyngbya sp. O-77	GCA_001548395.1	5.48	0	100	0
Leptolyngbya sp. PCC 7376	GCA_000316605.1	5.13	0	100	0
Limnospira indica PCC 8005	GCA_000973065.1	6.23	0	100	0
Microcoleus sp. PCC 7113	GCA_000317515.1	7.47	0.5	93.7265	0.530636
Microcystis aeruginosa NIES-2481	GCA_001704955.2	4.29	0.15	96.6216	0.155004
Microcystis aeruginosa NIES-2549	GCA_000981785.2	4.29	0.01	99.7674	0.0100223
Microcystis aeruginosa NIES-843	GCA_000010625.1	5.84	0	100	0
Microcystis aeruginosa PCC 7806SL	GCA_002095975.1	5.14	0	100	0
Microcystis panniformis FACHB-1757	GCA_001264245.1	5.69	0	100	0
Microcystis sp. MC19	GCA_003019735.1	5.02	0	100	0
Microcystis viridis NIES-102	GCA_003945305.1	5.87	0	100	0
Moorea producens JHB	GCA_001854205.1	9.37	0.01	99.8934	0.0100097
Moorea producens PAL-8-15-08-1	GCA_001767235.1	9.67	0.04	99.5881	0.0401493
Nodularia spumigena CCY9414	GCA_000340565.3	5.46	0	100	0
Nodularia spumigena UHCC 0039	GCA_003054475.1	5.29	0.09	98.3271	0.0914475
Nostoc azollae 0708	GCA_000196515.1	5.35	0.13	97.6277	0.132982
Nostoc carneum NIES-2107	GCA_002368155.1	8.35	1	89.3048	1.10736
Nostoc commune HK-02	GCA_003990685.1	7.15	1.06	87.0889	1.20251
Nostoc flagelliforme CCNUN1	GCA_002813575.1	9.36	1.87	83.3482	2.19437
Nostoc linckia NIES-25	GCA_002368035.1	6.45	2.14	75.0873	2.77104
Nostoc piscinale CENA21	GCA_001298445.1	7.09	0	100	0
Nostoc punctiforme PCC 73102	GCA_000020025.1	8.23	0.82	90.9392	0.893643
Nostoc sp. ATCC 53789	GCA_009873495.1	7.34	1.33	84.6597	1.5467
Nostoc sp. CENA543	GCA_002896875.1	6.99	0.21	97.0833	0.215842
Nostoc sp. HK-01	GCA_003990705.1	6.49	1.02	86.4181	1.16654
Nostoc sp. 'Lobaria pulmonaria (5183) cyanobiont'	GCA_002949795.1	7.06	0.27	96.3165	0.279542
Nostoc sp. NIES-2111	GCA_002368215.1	6.52	1.36	82.7411	1.6171
Nostoc sp. NIES-3756	GCA_001548375.1	6.46	0.53	92.4177	0.570213
Nostoc sp. NIES-4103	GCA_002368335.1	8.42	0.17	98.021	0.173132
Nostoc sp. PCC 7107	GCA_000316625.1	6.33	0	100	0
Nostoc sp. PCC 7120 = FACHB-418	GCA_000009705.1	6.41	0.81	88.7812	0.904107
Nostoc sp. PCC 7524	GCA_000316645.1	6.64	0.09	98.6627	0.0911367
Nostoc sp. 'Peltigera membranacea cyanobiont' N6	GCA_002949735.1	8.21	0.67	92.455	0.719463
Nostoc sphaeroides Kutzing En	GCA_003443655.1	6.53	0.15	97.7545	0.153211
Nostoc sphaeroides CCNUC1	GCA_009372195.1	8.82	0.7	92.6471	0.74989
Nostocales cyanobacterium HT-58-2	GCA_002163975.1	7.85	0.06	99.2415	0.0604221
Oscillatoria acuminata PCC 6304	GCA_000317105.1	7.69	0.11	98.5897	0.111449
Oscillatoria nigro-viridis PCC 7112	GCA_000317475.1	7.48	0.79	90.4474	0.865873
Oscillatoriales cyanobacterium JSC-12	GCA_000309945.1	5.53	0	100	0
Planktothrix agardhii NIES-204	GCA_003609755.1	4.78	0.3	94.0945	0.317815
Planktothrix agardhii NIVA-CYA 126/8	GCA_000710505.1	4.79	0.26	94.8515	0.273363
Pleurocapsa sp. PCC 7327	GCA_000317025.1	4.99	0	100	0
Prochlorococcus marinus str. AS9601	GCA_000015645.1	1.67	0	100	0
Prochlorococcus marinus str. MIT 9211	GCA_000018585.1	1.69	0	100	0
Prochlorococcus marinus str. MIT 9215	GCA_000018065.1	1.74	0	100	0
Prochlorococcus marinus str. MIT 9301	GCA_000015965.1	1.64	0	100	0
Prochlorococcus marinus str. MIT 9303	GCA_000015705.1	2.68	0	100	0
Prochlorococcus marinus str. MIT 9312	GCA_000012645.1	1.71	0	100	0
Prochlorococcus marinus str. MIT 9313	GCA_000011485.1	2.41	0	100	0
Prochlorococcus marinus str. MIT 9515	GCA_000015665.1	1.7	0	100	0
Prochlorococcus marinus str. NATL1A	GCA_000015685.1	1.86	0	100	0
Prochlorococcus marinus str. NATL2A	GCA_000012465.1	1.84	0	100	0
Prochlorococcus marinus subsp. marinus str. CCMP1375	GCA_000007925.1	1.75	0	100	0
Prochlorococcus marinus subsp. pastoris str. CCMP1986	GCA_000011465.1	1.66	0	100	0
Prochlorococcus sp. MIT 0604	GCA_000757845.1	1.78	0	100	0
Prochlorococcus sp. MIT 0801	GCA_000757865.1	1.93	0	100	0
Prochlorococcus sp. RS01	GCA_001989435.1	1.66	0	100	0
Prochlorococcus sp. RS04	GCA_001989455.1	1.66	0	100	0
Prochlorococcus sp. RS50	GCA_001989415.1	1.66	0	100	0
Pseudanabaena sp. ABRG5-3	GCA_003967015.1	4.8	0.85	84.9558	0.99061
Pseudanabaena sp. PCC 7367	GCA_000317065.1	4.56	0.33	93.2515	0.352634
Raphidiopsis curvata NIES-932	GCA_002368135.1	3.43	0	100	0
Rippkaea orientalis PCC 8801	GCA_000021805.1	4.68	0.11	97.7035	0.112459
Rippkaea orientalis PCC 8802	GCA_000024045.1	4.67	0.13	97.2917	0.133441
Rivularia sp. PCC 7116	GCA_000316665.1	8.7	0.03	99.6564	0.0300944
Scytonema sp. HK-05	GCA_002368235.1	8.82	0.95	90.2764	1.04137
Scytonema sp. NIES-4073	GCA_002368435.1	9.45	0.4	95.9391	0.4152
Sphaerospermopsis kisseleviana NIES-73	GCA_002368075.1	5.35	0.26	95.3654	0.271894
Stanieria cyanosphaera PCC 7437	GCA_000317575.1	5.04	0.51	90.8108	0.558471
Stanieria sp. NIES-3757	GCA_002355455.1	5.32	0.14	97.4359	0.143478
Synechococcus elongatus PCC 11801	GCA_003846445.1	2.69	0	100	0
Synechococcus elongatus PCC 11802	GCA_009498715.1	2.76	0	100	0
Synechococcus elongatus PCC 6301	GCA_000010065.1	2.7	0	100	0
Synechococcus elongatus PCC 7942 = FACHB-805	GCA_000012525.1	2.7	0.05	98.1818	0.0509
Synechococcus elongatus UTEX 3055	GCA_003957805.1	2.77	0.11	96.1806	0.114238
Synechococcus lividus PCC 6715	GCA_002754935.1	2.66	0	100	0
Synechococcus sp. CB0101	GCA_000179235.2	2.79	0	100	0
Synechococcus sp. CC9311	GCA_000014585.1	2.61	0	100	0
Synechococcus sp. CC9605	GCA_000012625.1	2.51	0	100	0
Synechococcus sp. CC9902	GCA_000012505.1	2.23	0	100	0
Synechococcus sp. JA-2-3B'a(2-13)	GCA_000013225.1	3.05	0	100	0
Synechococcus sp. JA-3-3Ab	GCA_000013205.1	2.93	0	100	0
Synechococcus sp. KORDI-100	GCA_000737535.1	2.79	0	100	0
Synechococcus sp. KORDI-49	GCA_000737575.1	2.59	0	100	0
Synechococcus sp. KORDI-52	GCA_000737595.1	2.57	0	100	0
Synechococcus sp. NIES-970	GCA_002356215.1	2.84	0.3	90.4459	0.330594
Synechococcus sp. PCC 11901	GCA_005577135.1	3.08	0.39	88.7608	0.437461
Synechococcus sp. PCC 6312	GCA_000316685.1	3.7	0.02	99.4624	0.0201041
Synechococcus sp. PCC 7002	GCA_000019485.1	3.01	0.4	88.2698	0.451112
Synechococcus sp. PCC 7003	GCA_001693255.1	3.06	0.28	91.6168	0.30469
Synechococcus sp. PCC 7117	GCA_001693275.1	3.09	0.34	90.0875	0.375992
Synechococcus sp. PCC 73109	GCA_001521855.1	3.03	0.28	91.5408	0.304942
Synechococcus sp. PCC 7336	GCA_000332275.1	5.07	0	100	0
Synechococcus sp. PCC 7502	GCA_000317085.1	3.51	0.07	98.0447	0.0713451
Synechococcus sp. PCC 8807	GCA_001693295.1	3.06	0.25	92.4471	0.269696
Synechococcus sp. RCC307	GCA_000063525.1	2.22	0	100	0
Synechococcus sp. RSCCF101	GCA_008807075.1	2.98	0	100	0
Synechococcus sp. SynAce01	GCA_001885215.1	2.75	0	100	0
Synechococcus sp. UTEX 2973	GCA_000817325.1	2.69	0.06	97.8182	0.0613007
Synechococcus sp. WH 7803	GCA_000063505.1	2.37	0	100	0
Synechococcus sp. WH 8020	GCA_001040845.1	2.66	0	100	0
Synechococcus sp. WH 8101	GCA_004209775.1	2.63	0	100	0
Synechococcus sp. WH 8102	GCA_000195975.1	2.43	0	100	0
Synechococcus sp. WH 8103	GCA_001182765.1	2.43	0	100	0
Synechococcus sp. WH 8109	GCA_000161795.2	2.11	0	100	0
Synechocystis sp. IPPAS B-1465	GCA_003015225.1	3.57	0.28	92.7273	0.301052
Synechocystis sp. PCC 6714	GCA_000478825.2	3.49	0.25	93.3155	0.267192
Synechocystis sp. PCC 6803	GCA_000009725.1	3.57	0.37	90.6091	0.406687
Synechocystis sp. PCC 6803	GCA_000340785.1	3.57	0.38	90.3797	0.418688
Synechocystis sp. PCC 6803	GCA_001318385.1	3.57	0	100	0
Synechocystis sp. PCC 6803 (GT-S)	GCA_000270265.1	3.57	0	100	0
Synechocystis sp. PCC 6803 substr. GT-I	GCA_000284135.1	3.57	0	100	0
Synechocystis sp. PCC 6803 substr. PCC-N	GCA_000284215.1	3.57	0	100	0
Synechocystis sp. PCC 6803 substr. PCC-P	GCA_000284455.1	3.57	0	100	0
Thermosynechococcus elongatus BP-1	GCA_000011345.1	2.59	0	100	0
Thermosynechococcus elongatus PKUAC-SCTE542	GCA_003555505.1	5.53	0	100	0
Thermosynechococcus sp. CL-1	GCA_008386235.1	2.65	0	100	0
Thermosynechococcus sp. NK55a	GCA_000505665.1	2.52	0	100	0
Thermosynechococcus vulcanus NIES-2134	GCA_003990665.2	2.57	0	100	0
Tolypothrix tenuis PCC 7101	GCA_002368295.1	8.7	0.66	92.9487	0.705063
Trichodesmium erythraeum IMS101	GCA_000014265.1	7.75	0	100	0
Trichormus variabilis ATCC 29413	GCA_000204075.1	6.37	0.75	89.4663	0.831335
Trichormus variabilis NIES-23	GCA_002368015.1	6.41	1.07	85.6952	1.23321
